# Supplementary material for: Spatial averaging implied in aquifer test interpretation: The meaning of estimated hydraulic properties
Source: Frontiers journal article supplement (doi:10.3389/feart.2022.1079287), 2023-01-04
Supplement: Data_Sheet_2.docx [file Data_Sheet_2.docx]

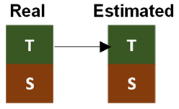

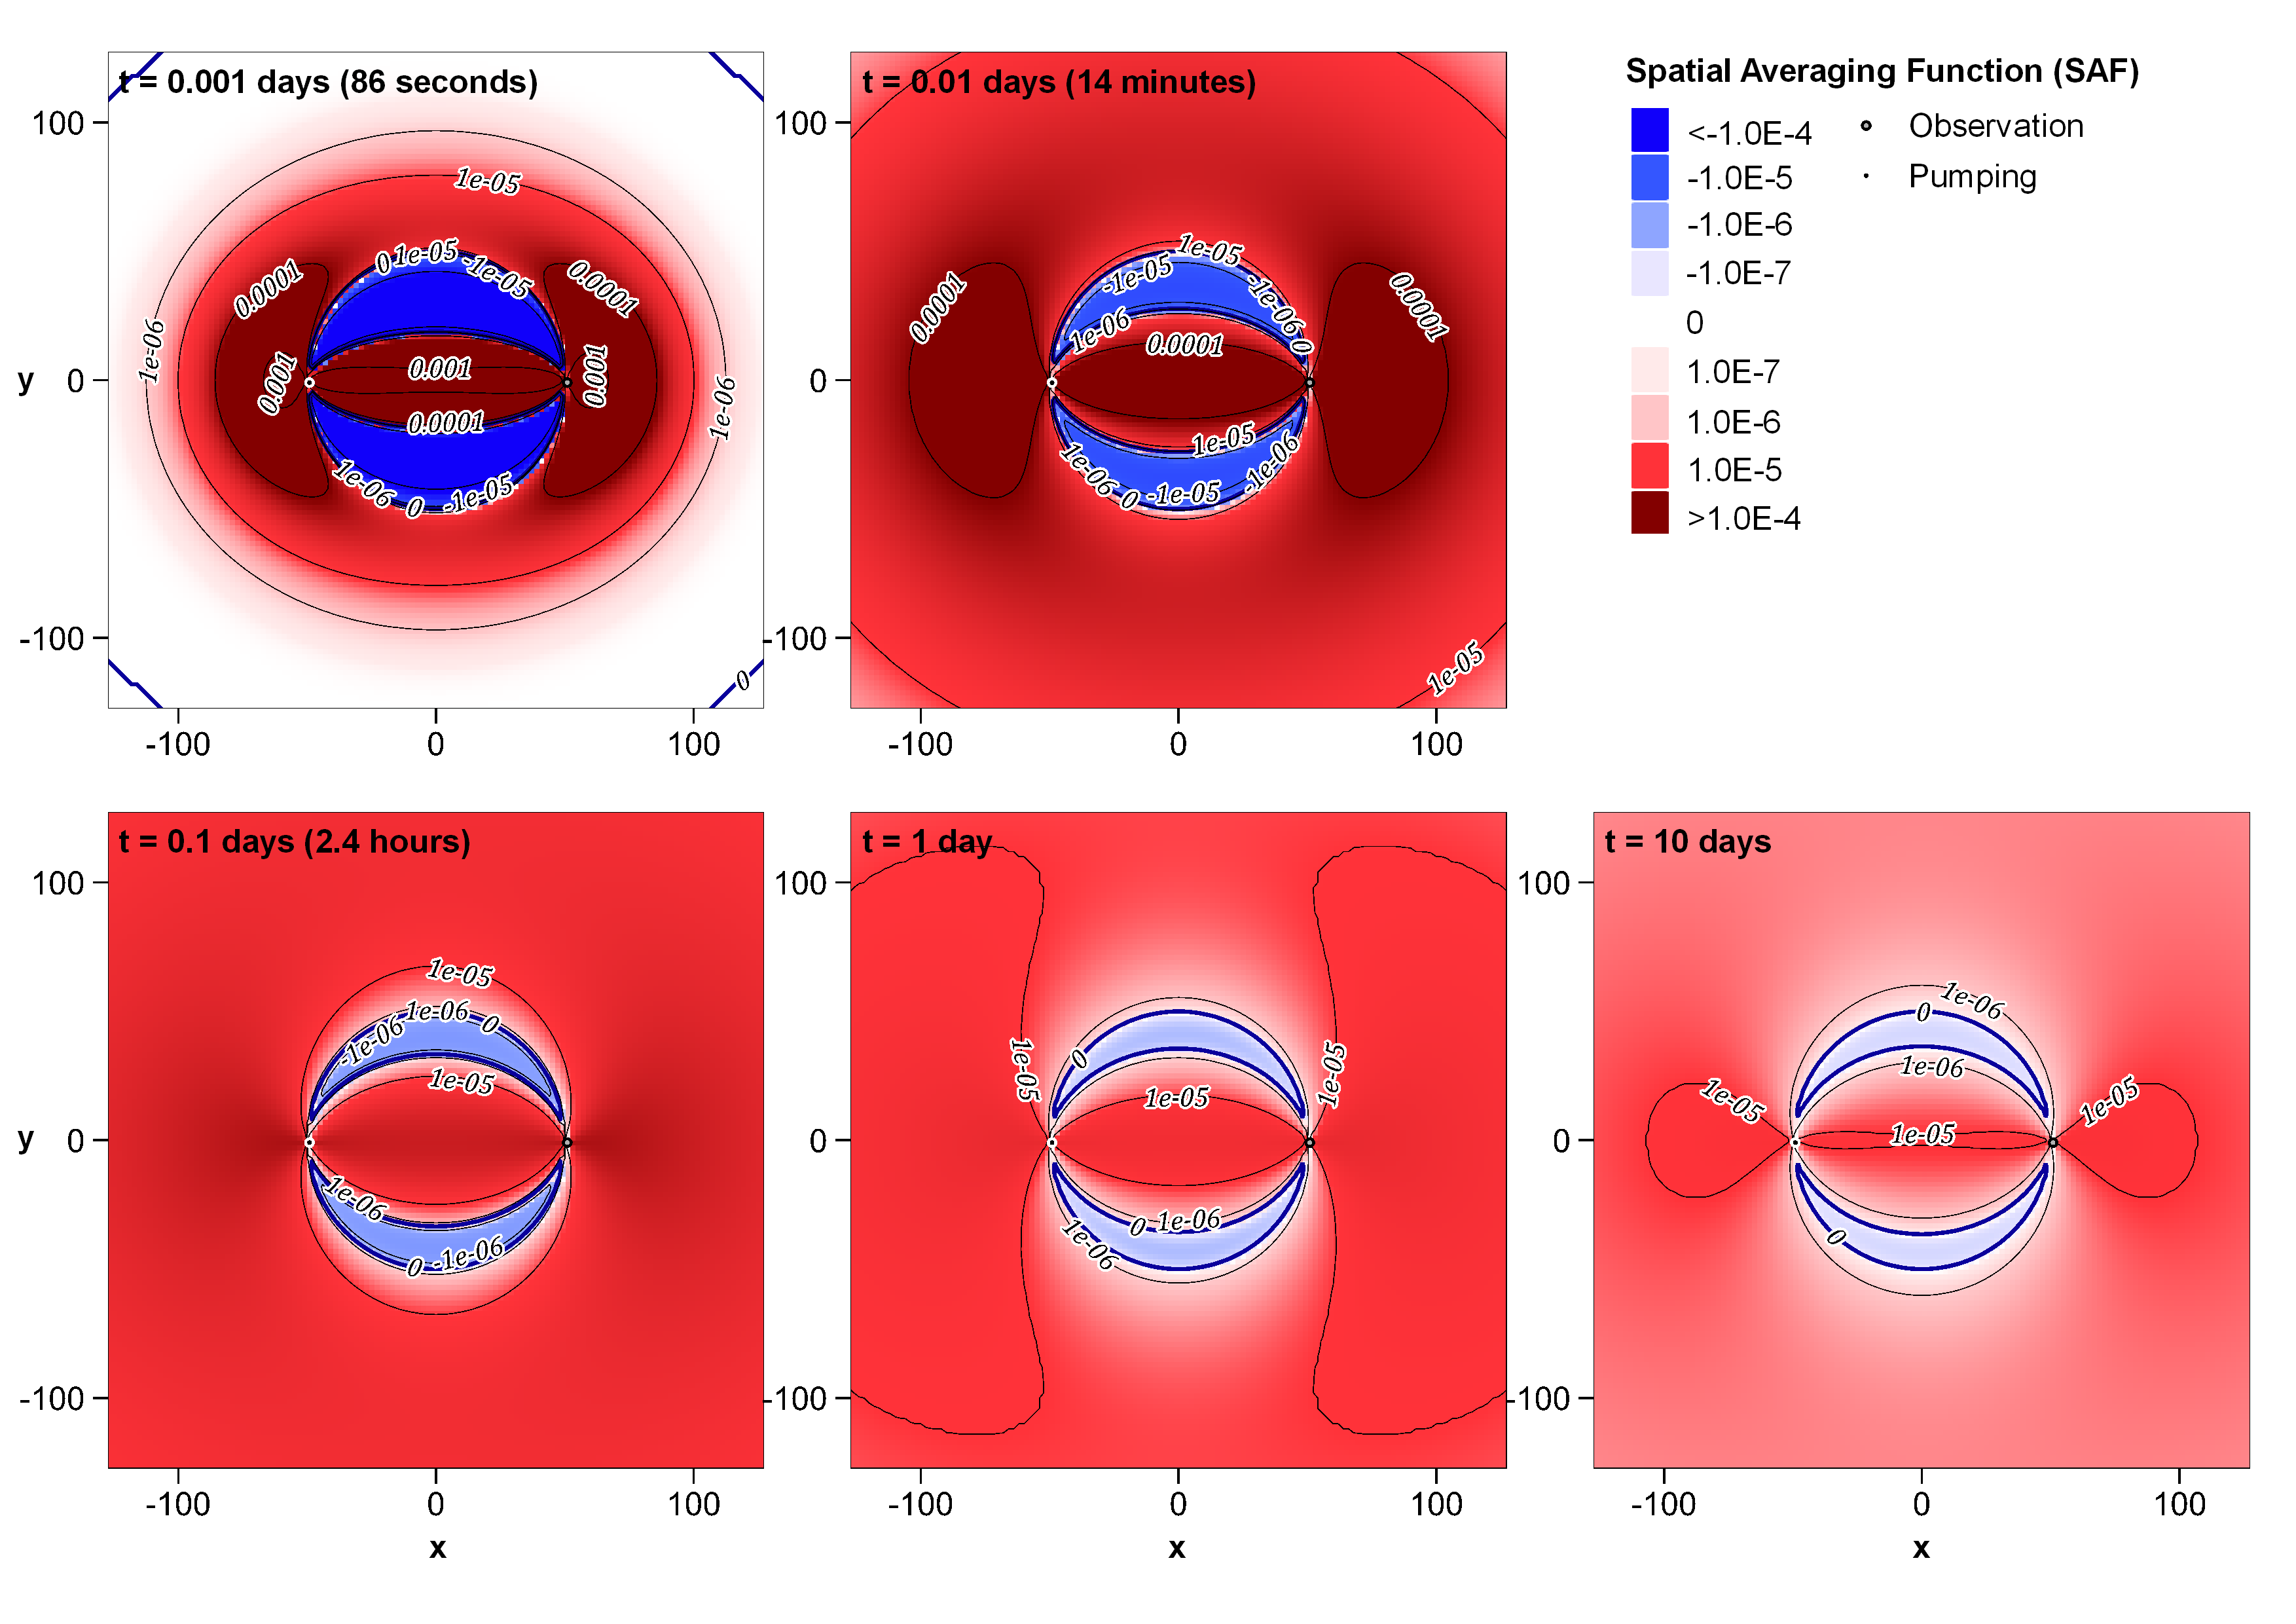


Figure A 1. *R'T*-*T* for separated wells at five different times. (log colouring/contour intervals)


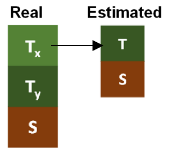

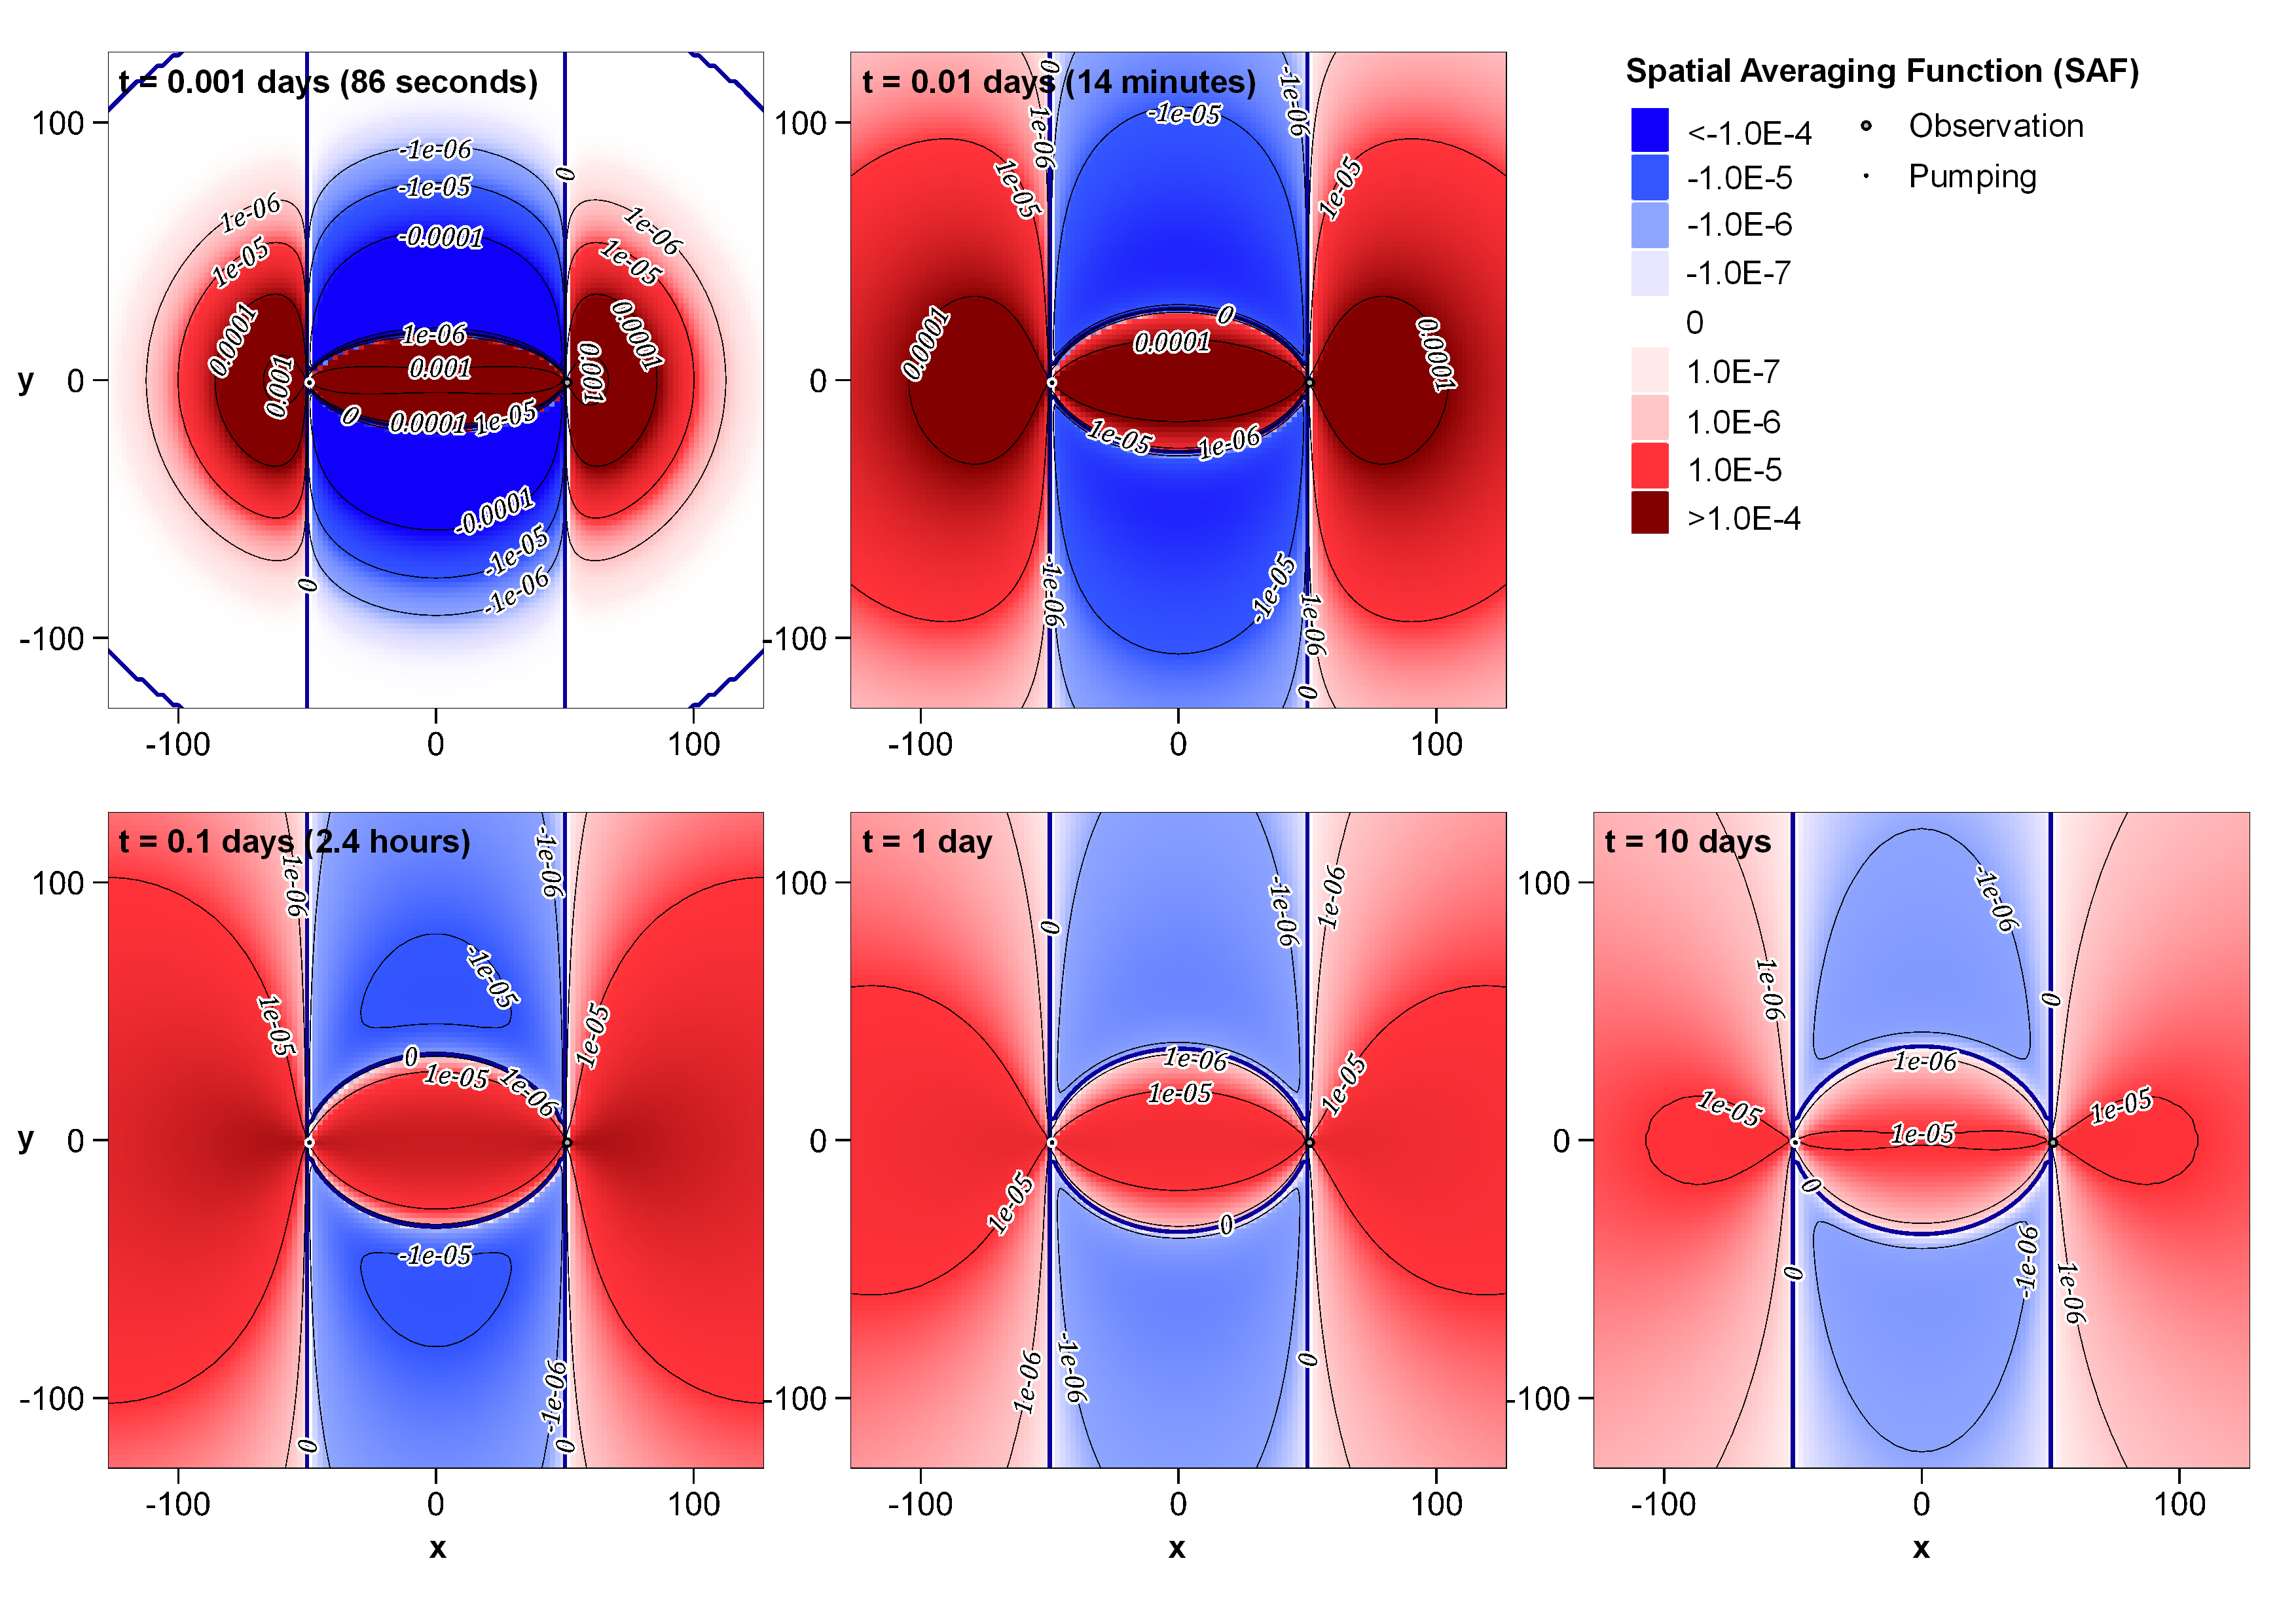


Figure A 2. *R'T*-*Tx* for separated wells at five different times. (log colouring/contour intervals)


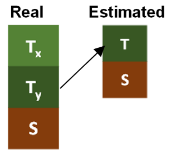

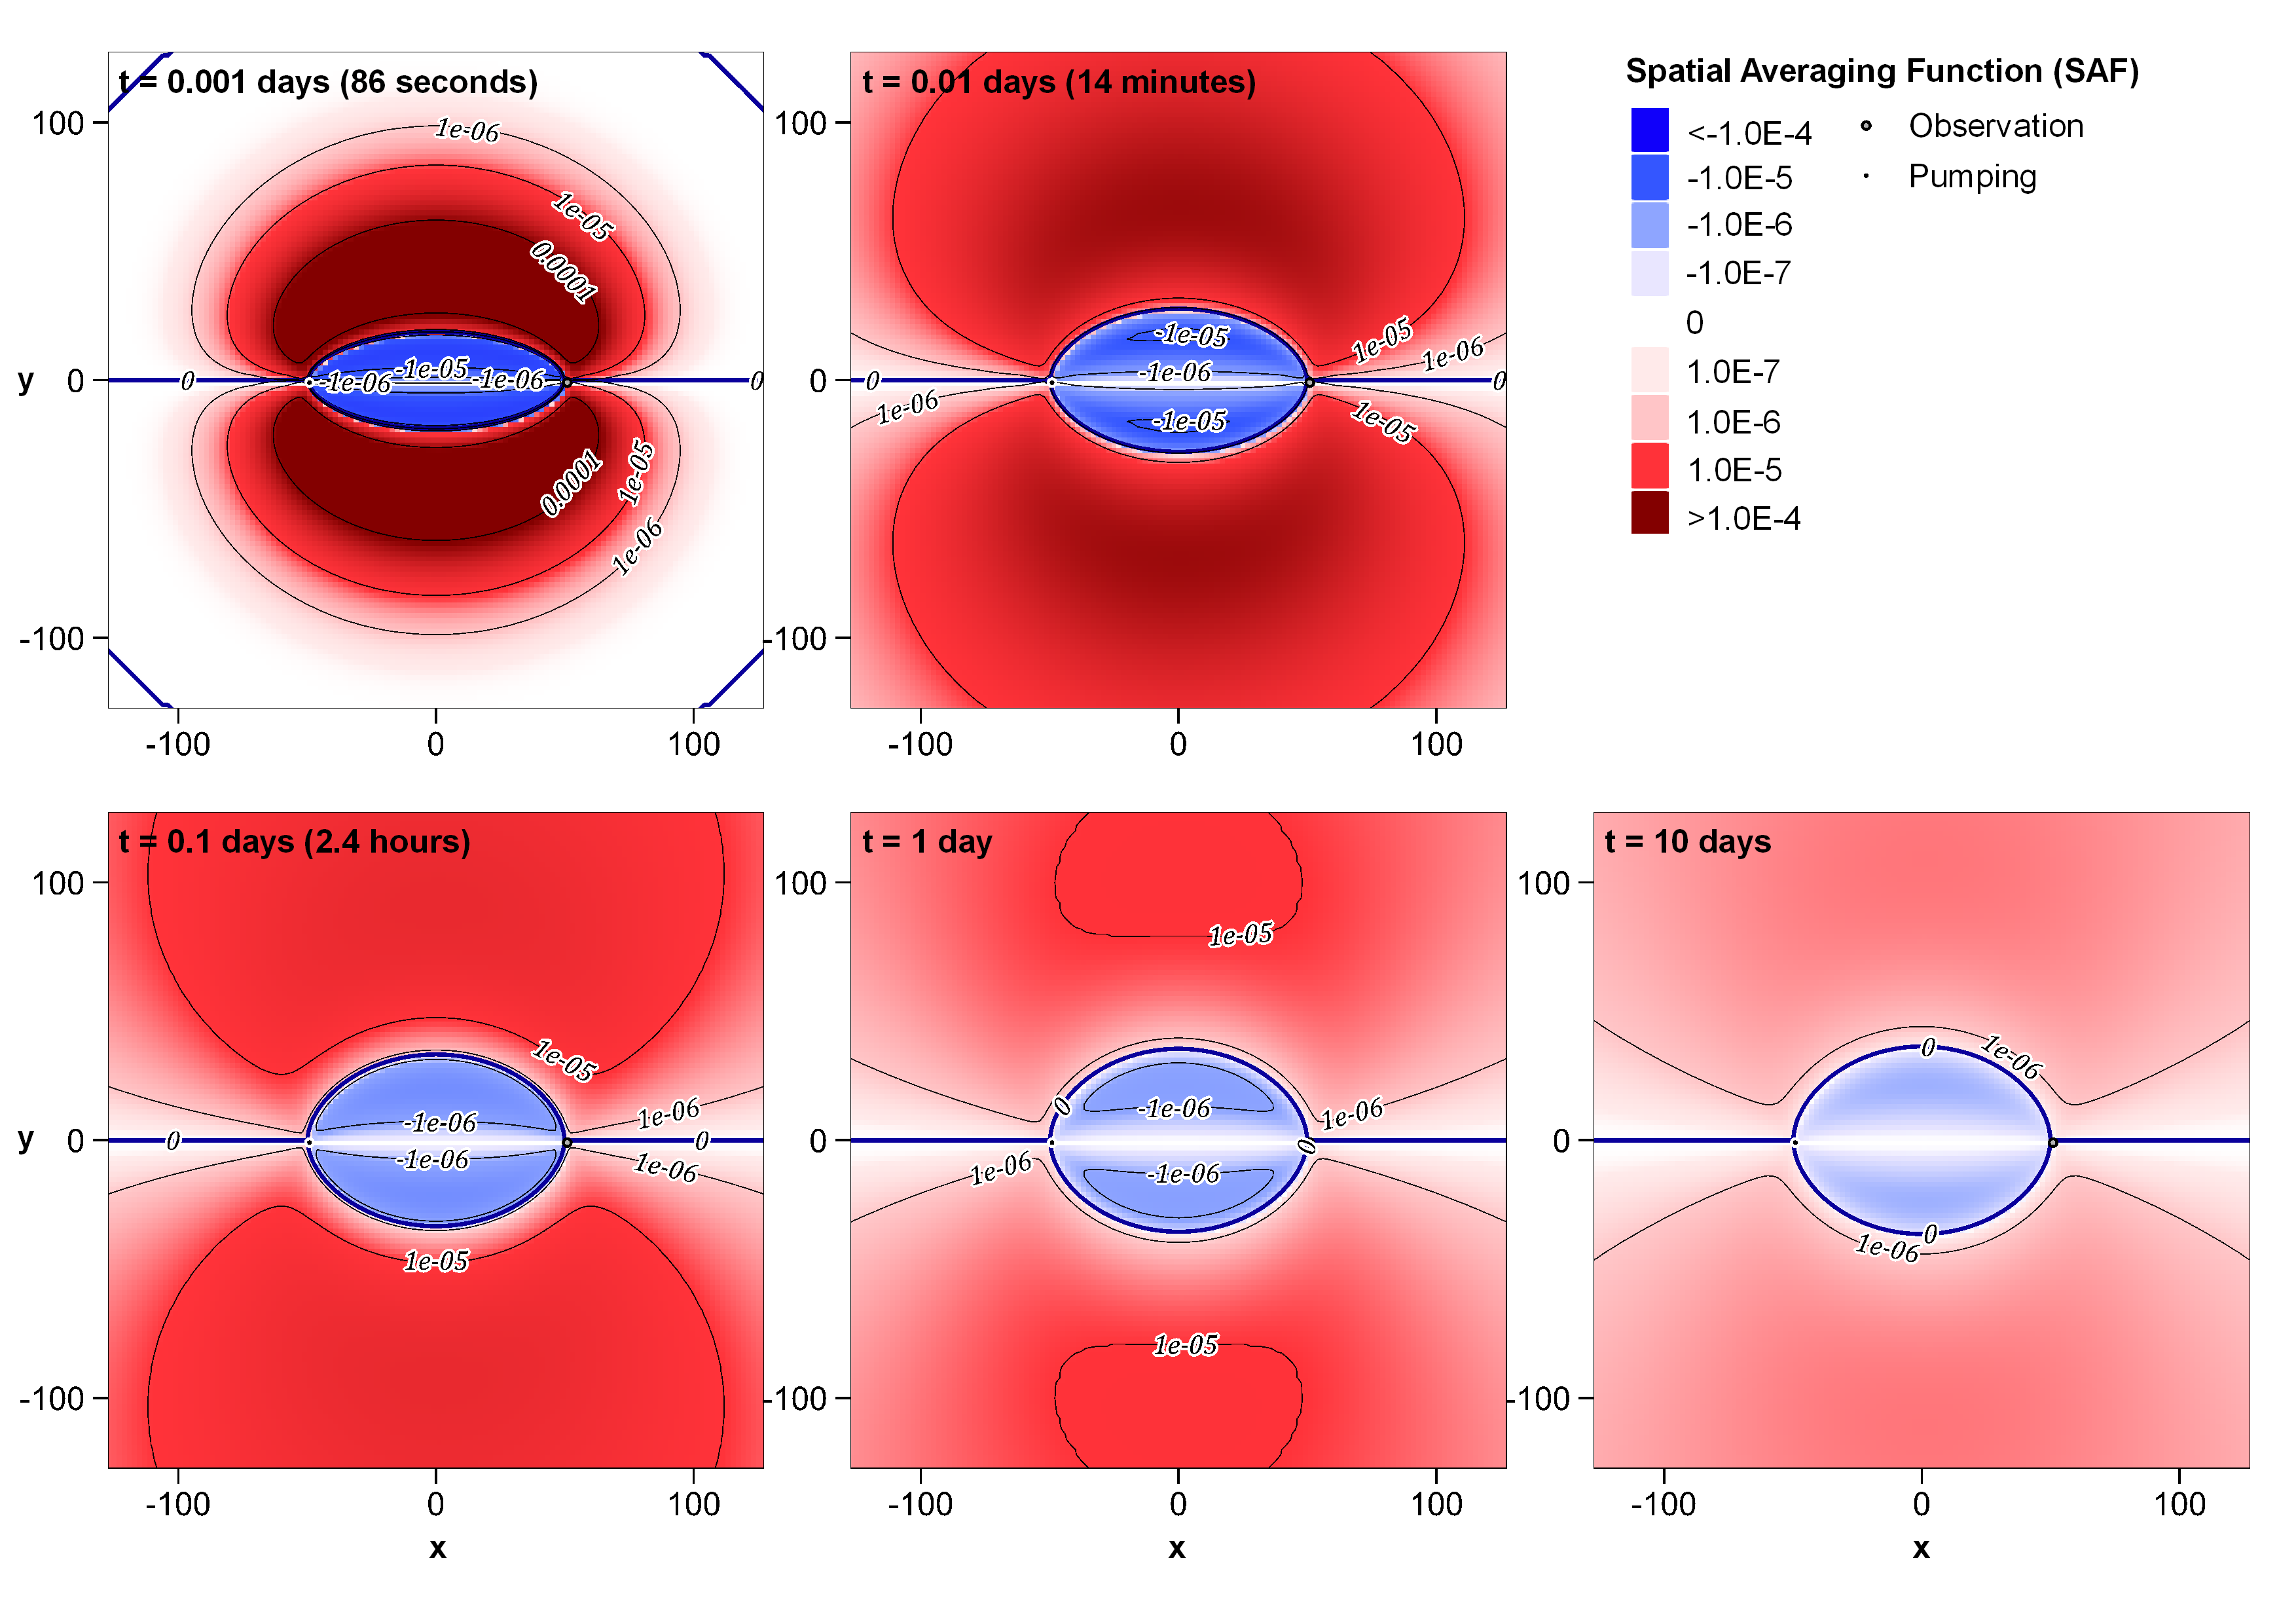


Figure A 3. *R'T*-*Ty* for separated wells at five different times. (log colouring/contour intervals)


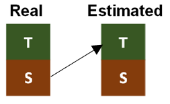

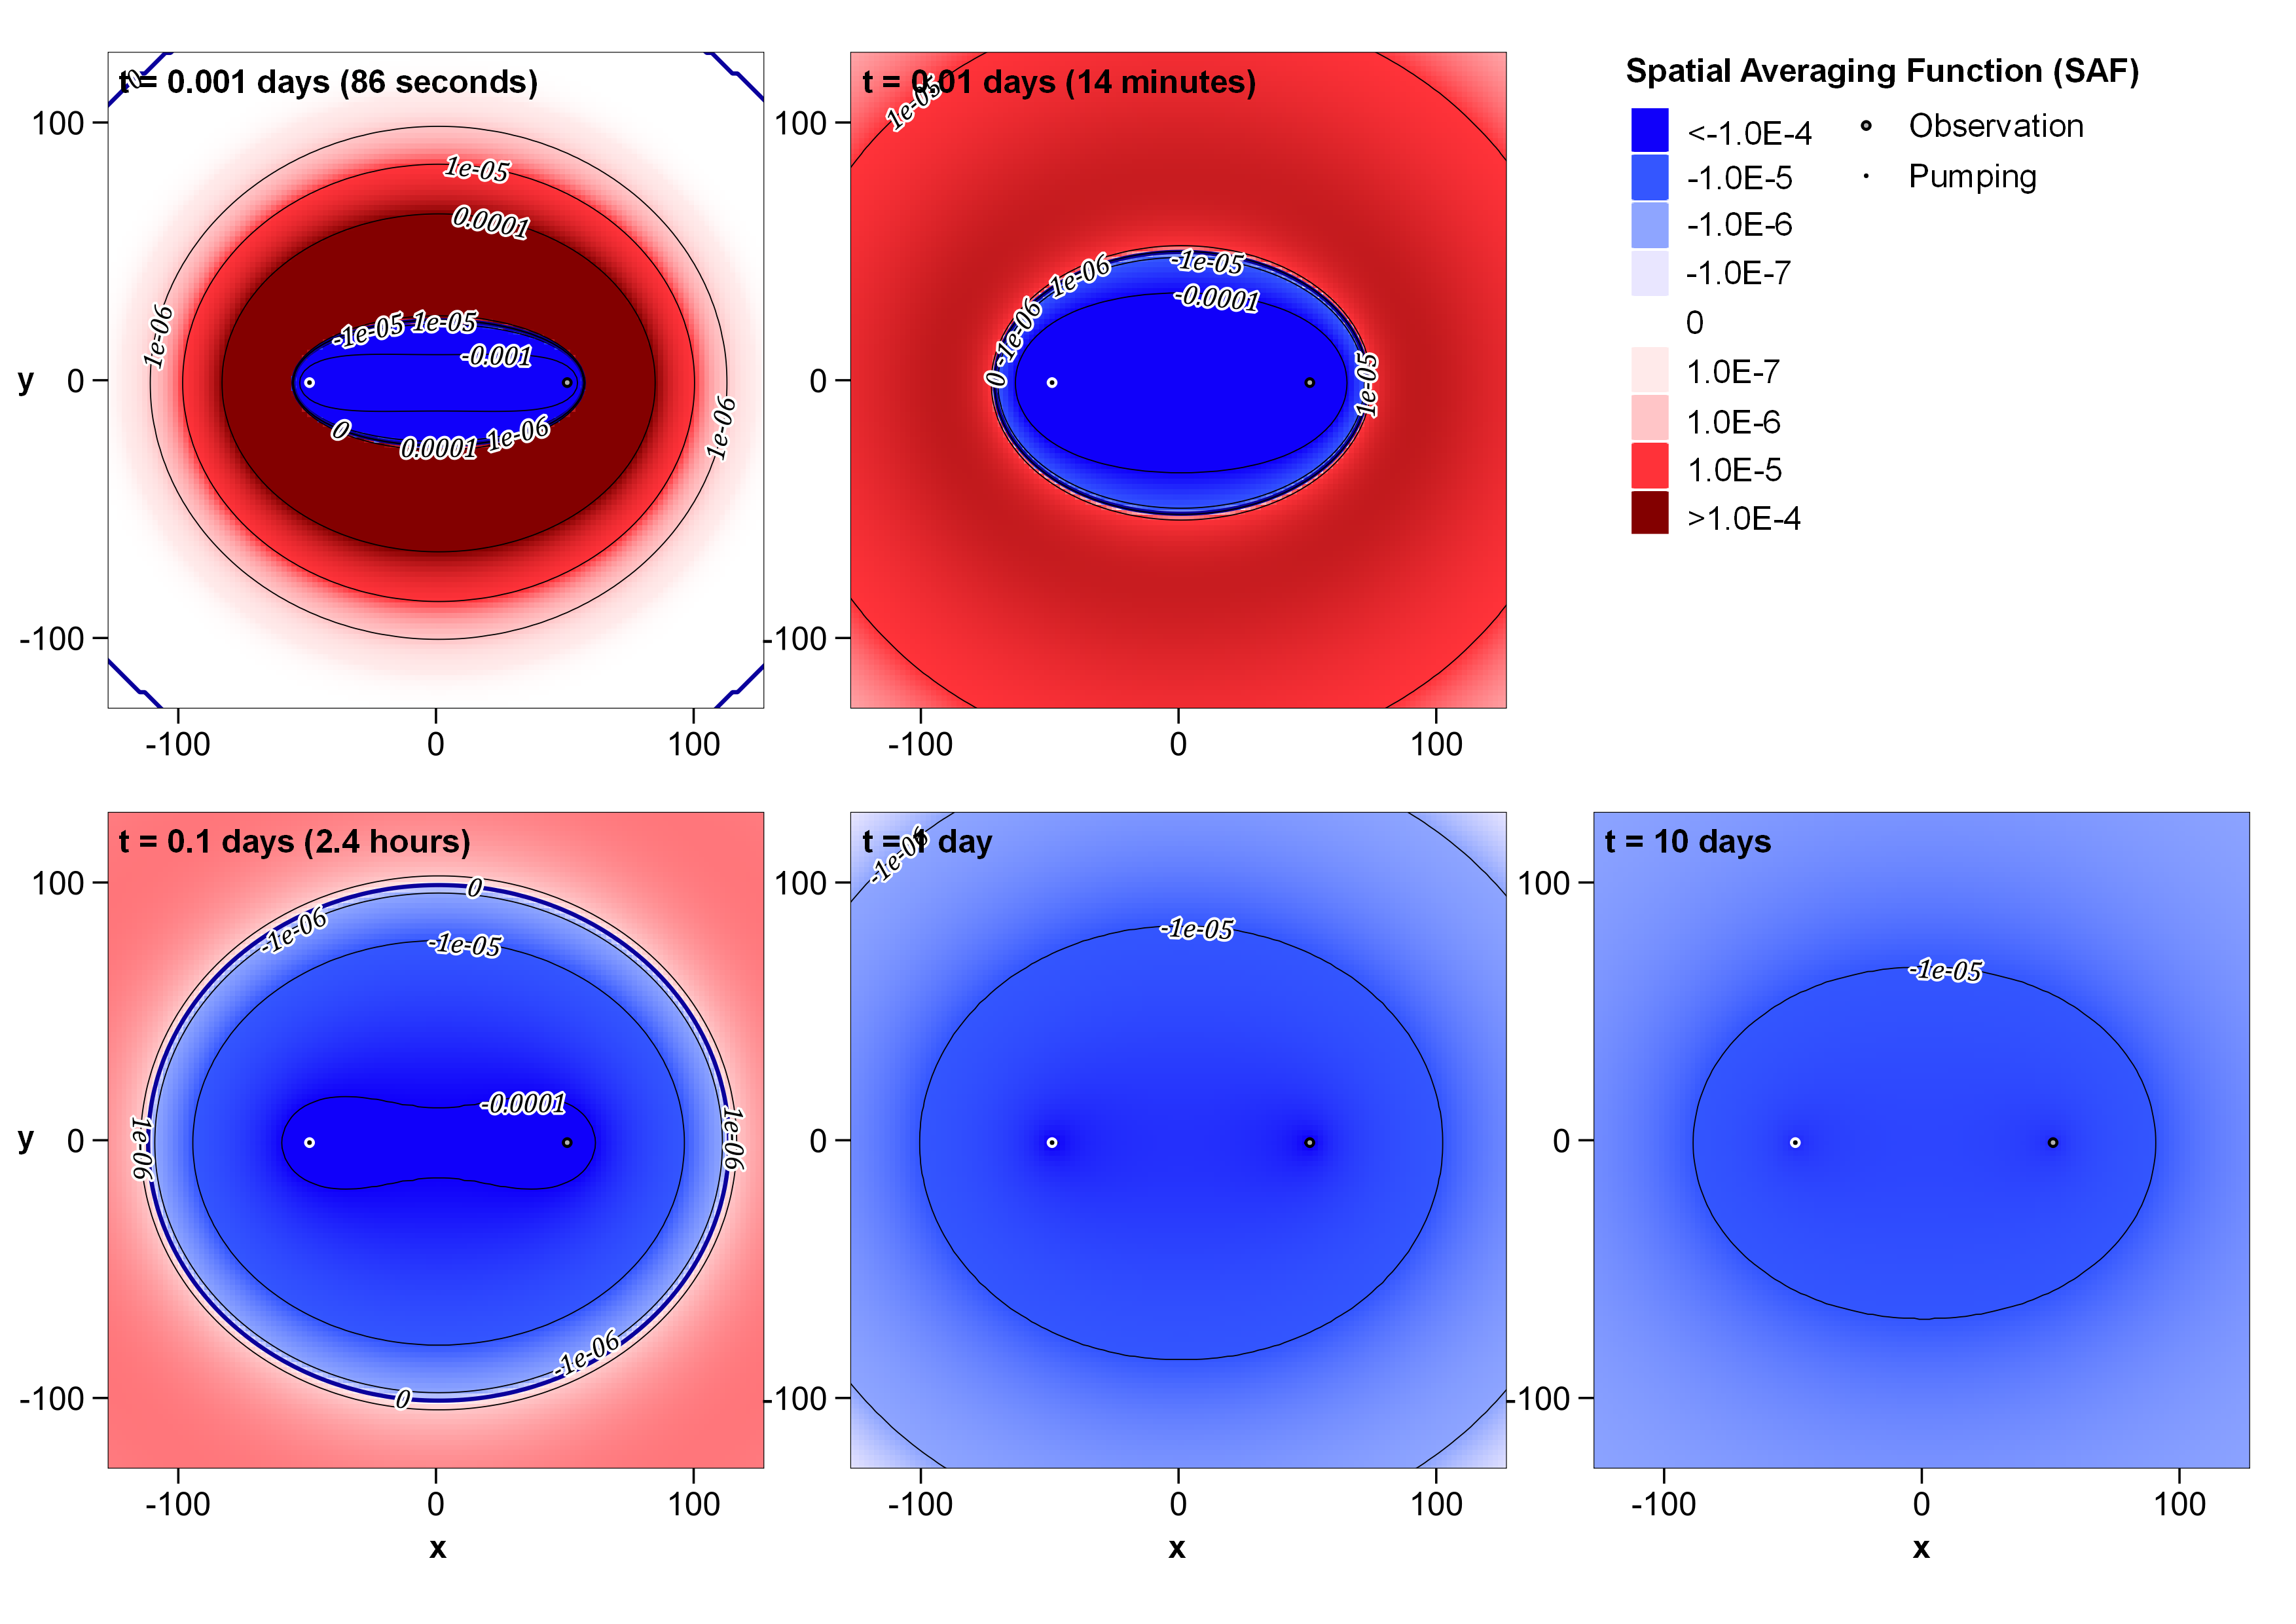


Figure A 4. *R'T*-*S* for separated wells at five different times. (log colouring/contour intervals)


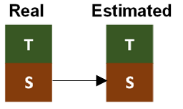

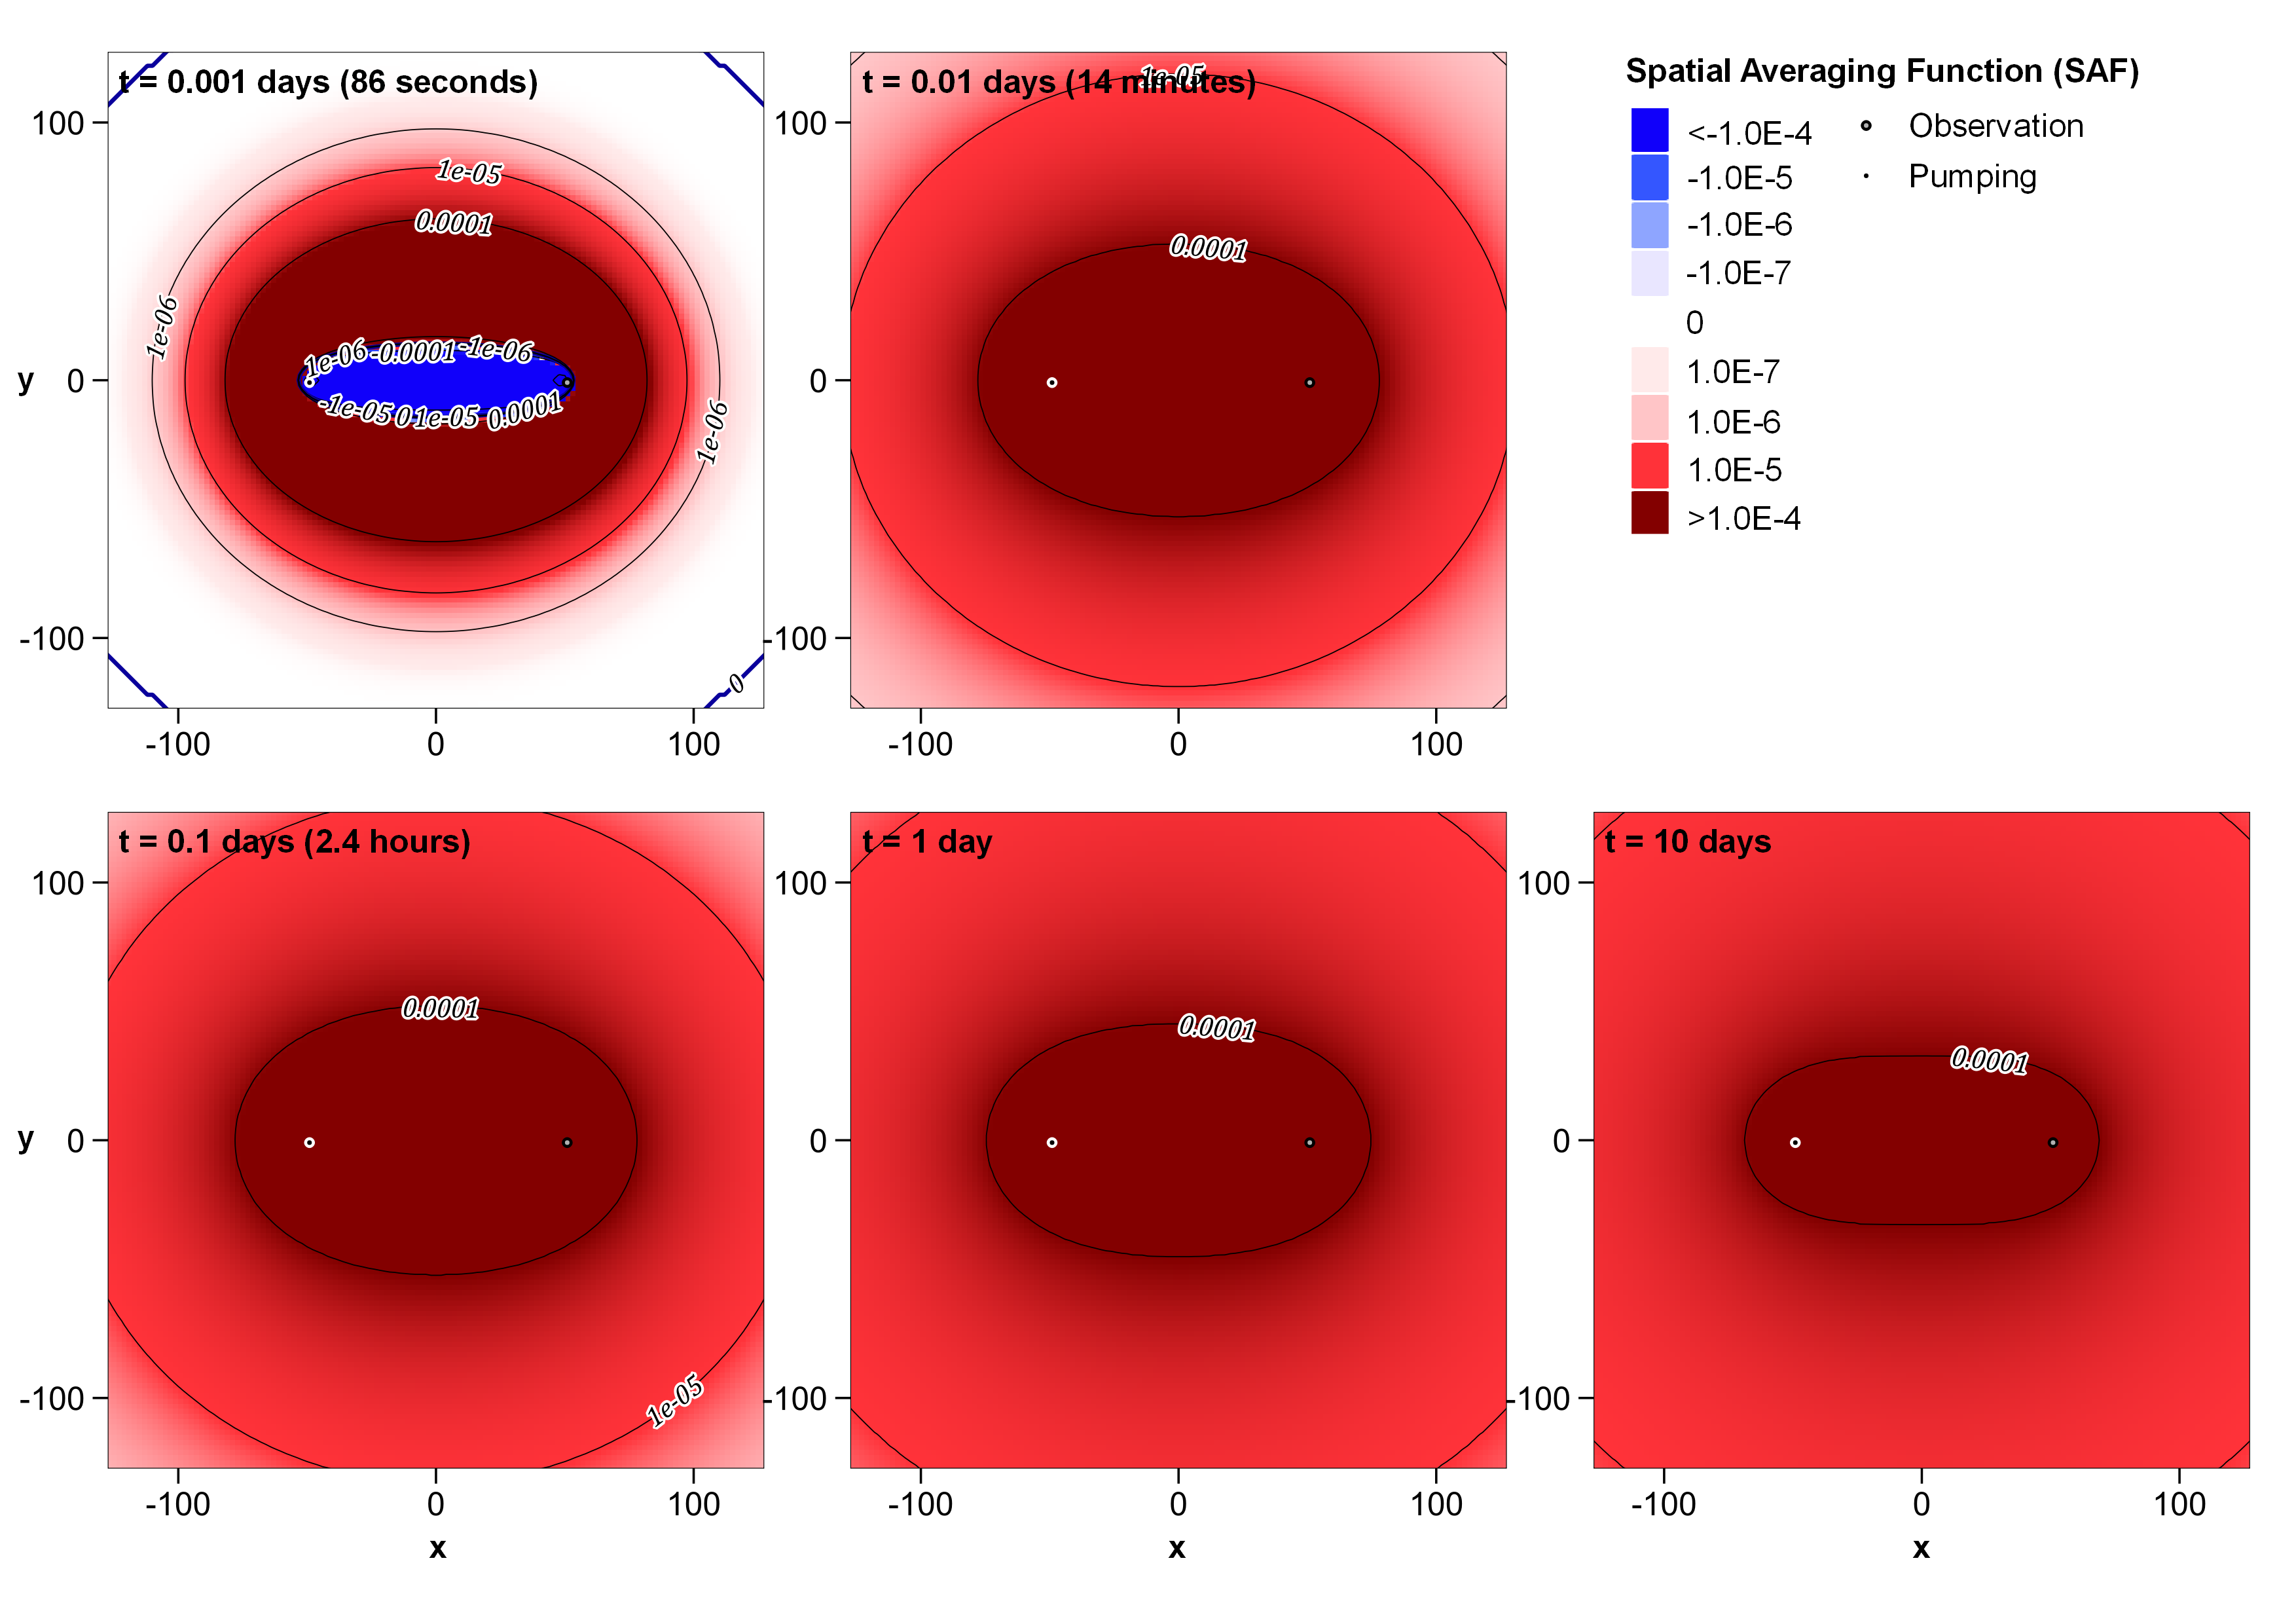


Figure A 5. *R'S*-*S* for separated wells at five different times. (log colouring/contour intervals)


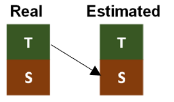

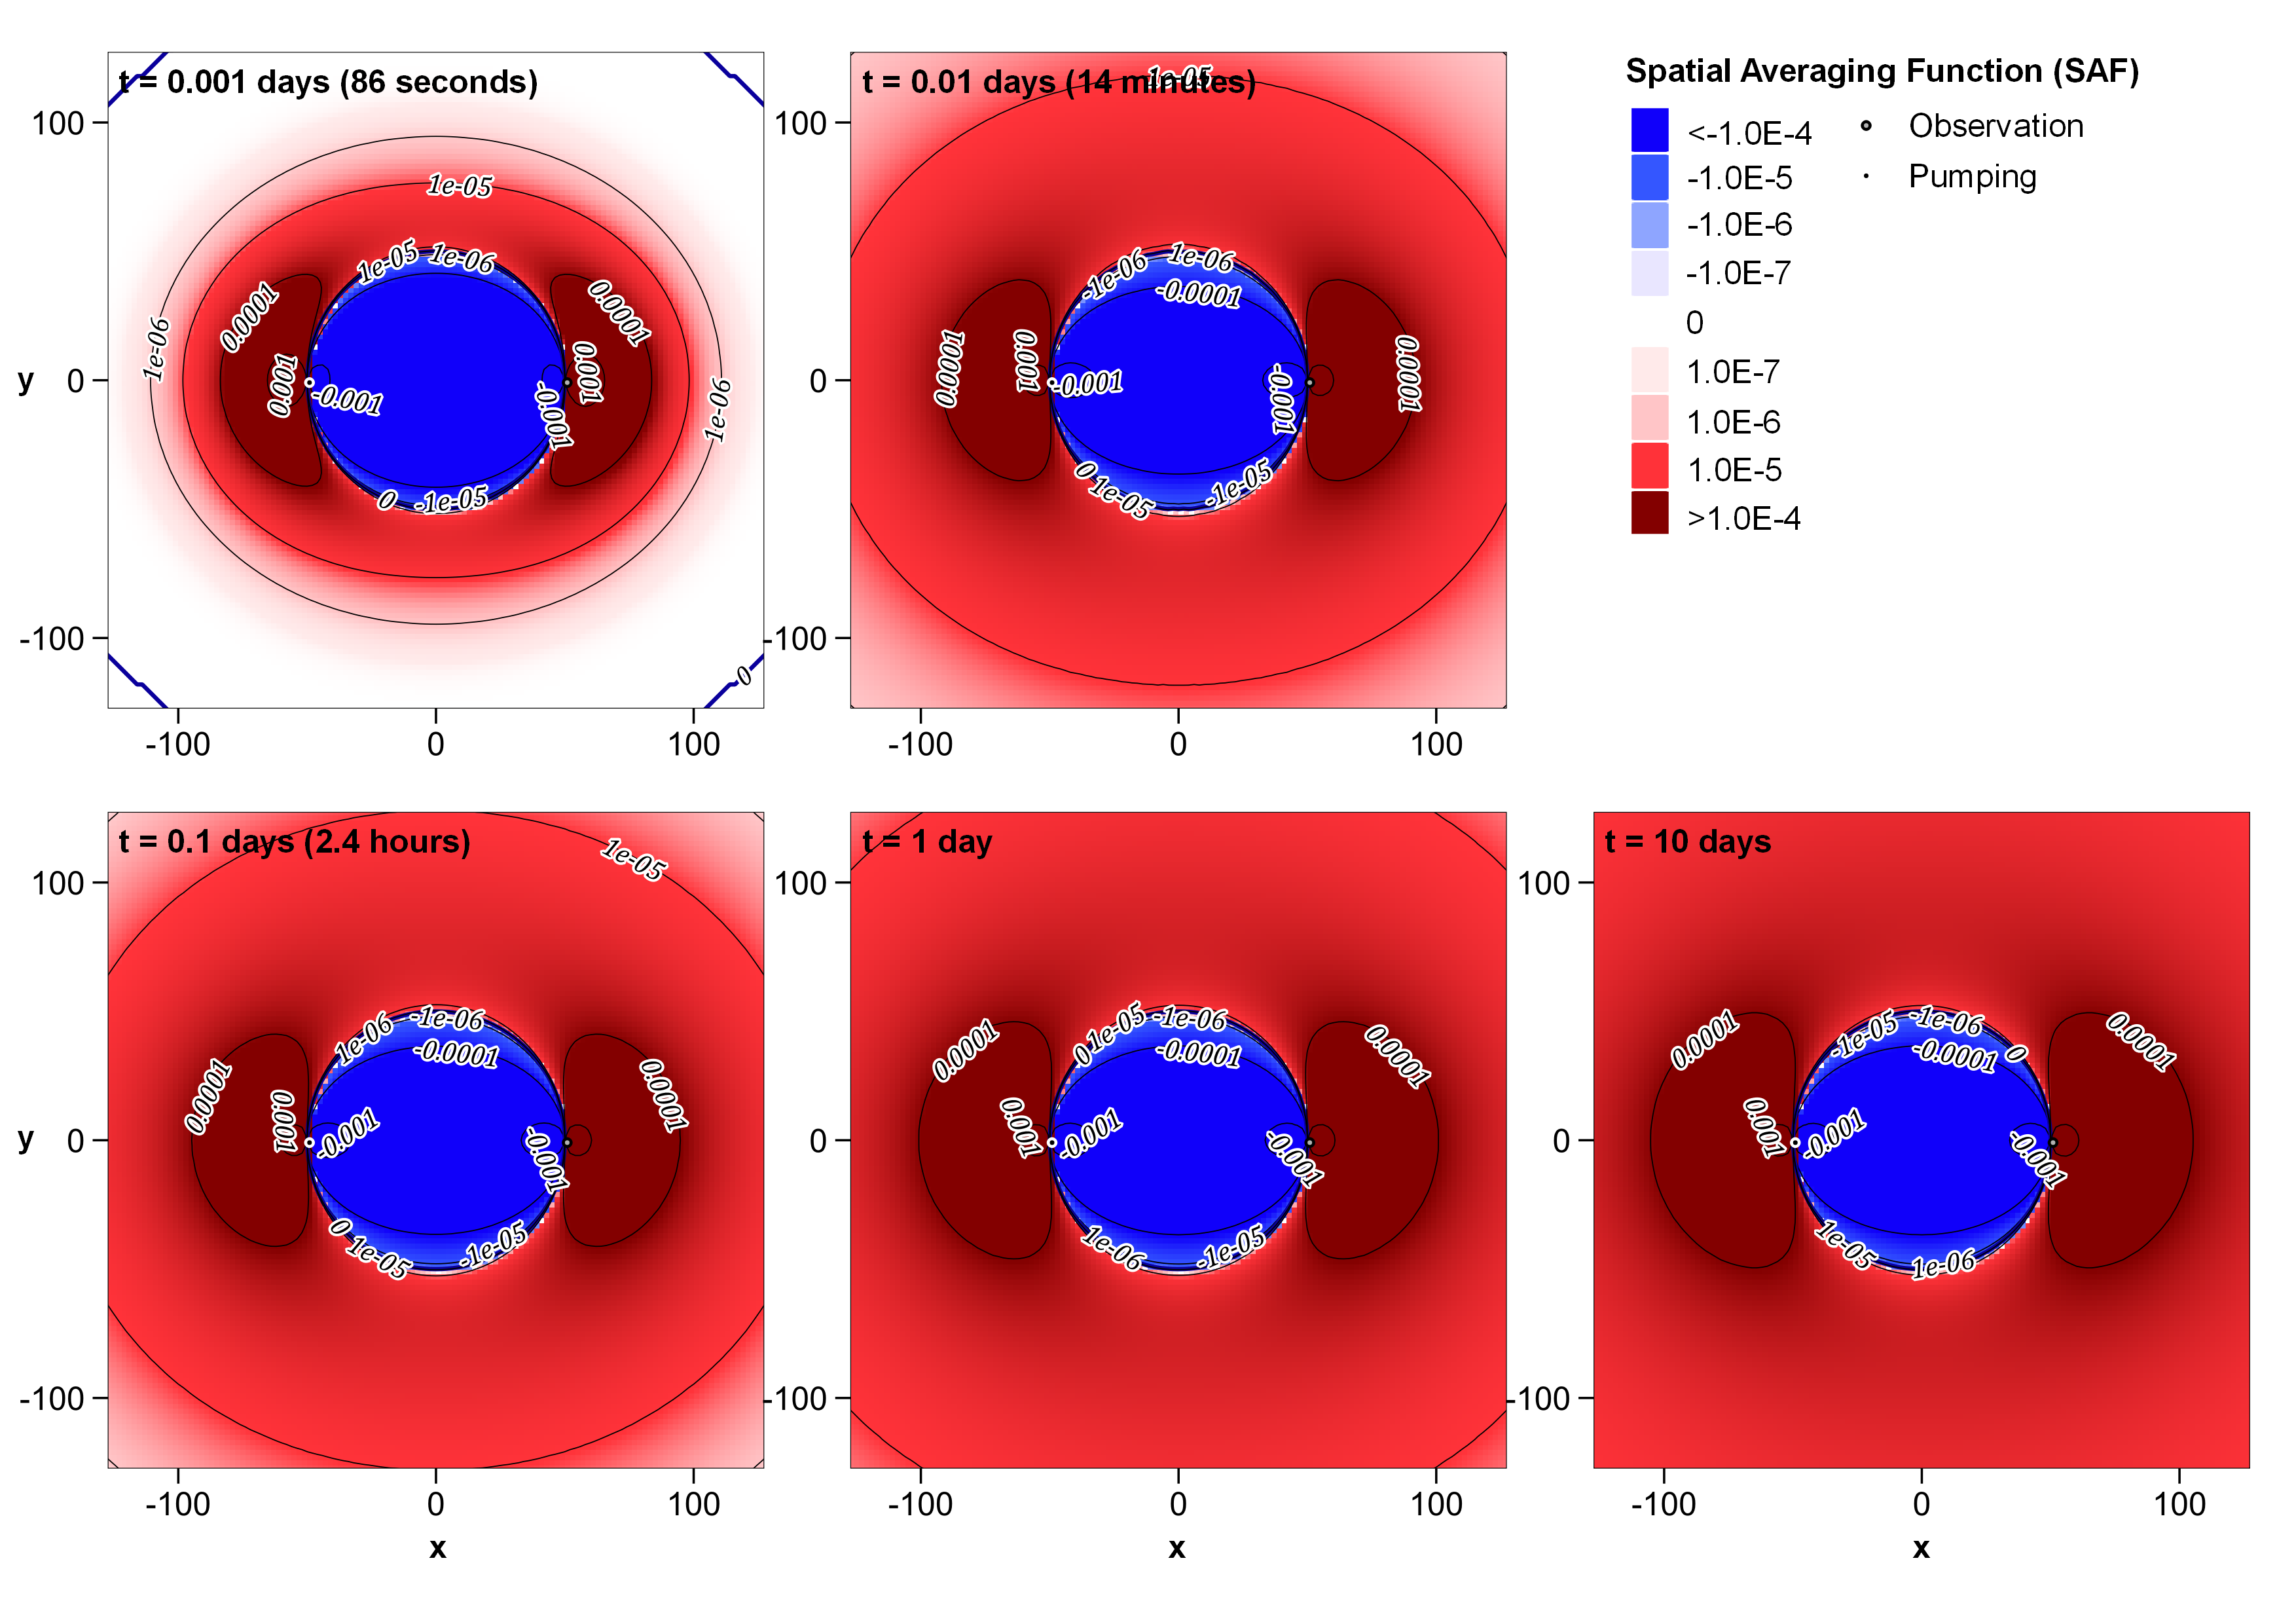


Figure A 6. *R'S*-*T* for separated wells at five different times. (log colouring/contour intervals)


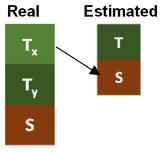

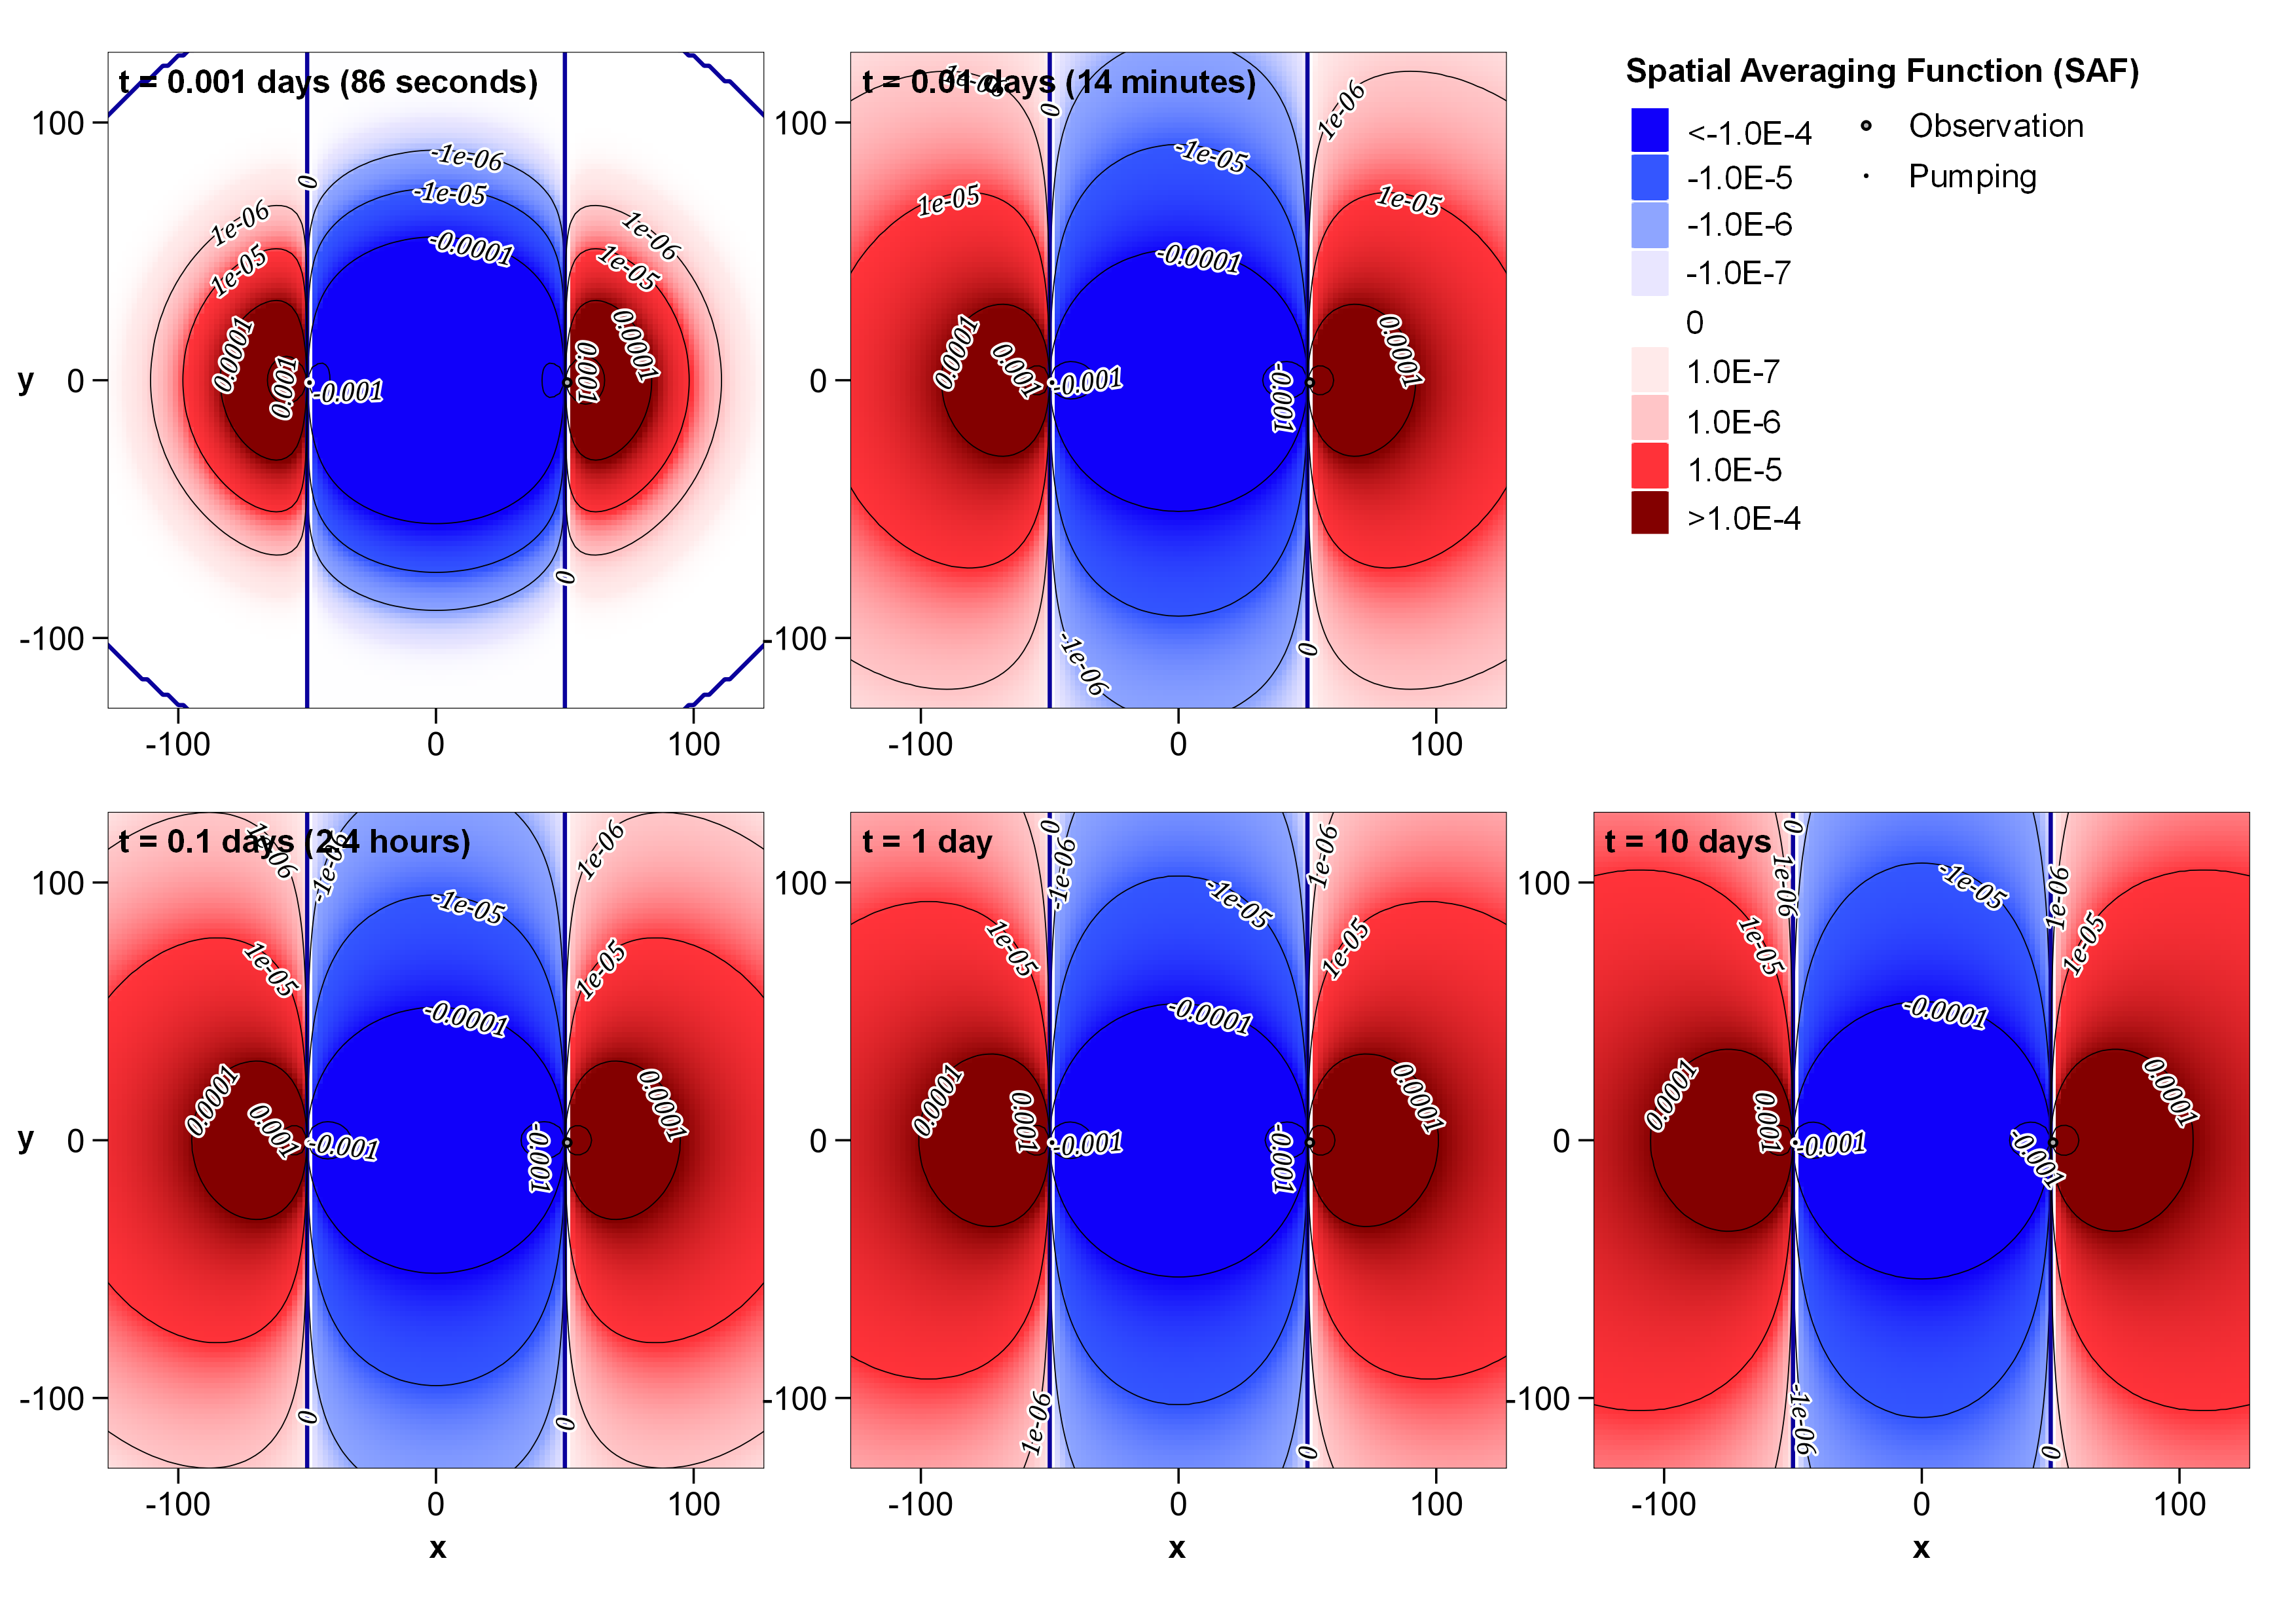


Figure A 7. *R'S*-*Tx* for separated wells at five different times. (log colouring/contour intervals)


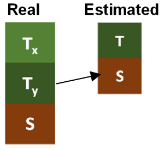

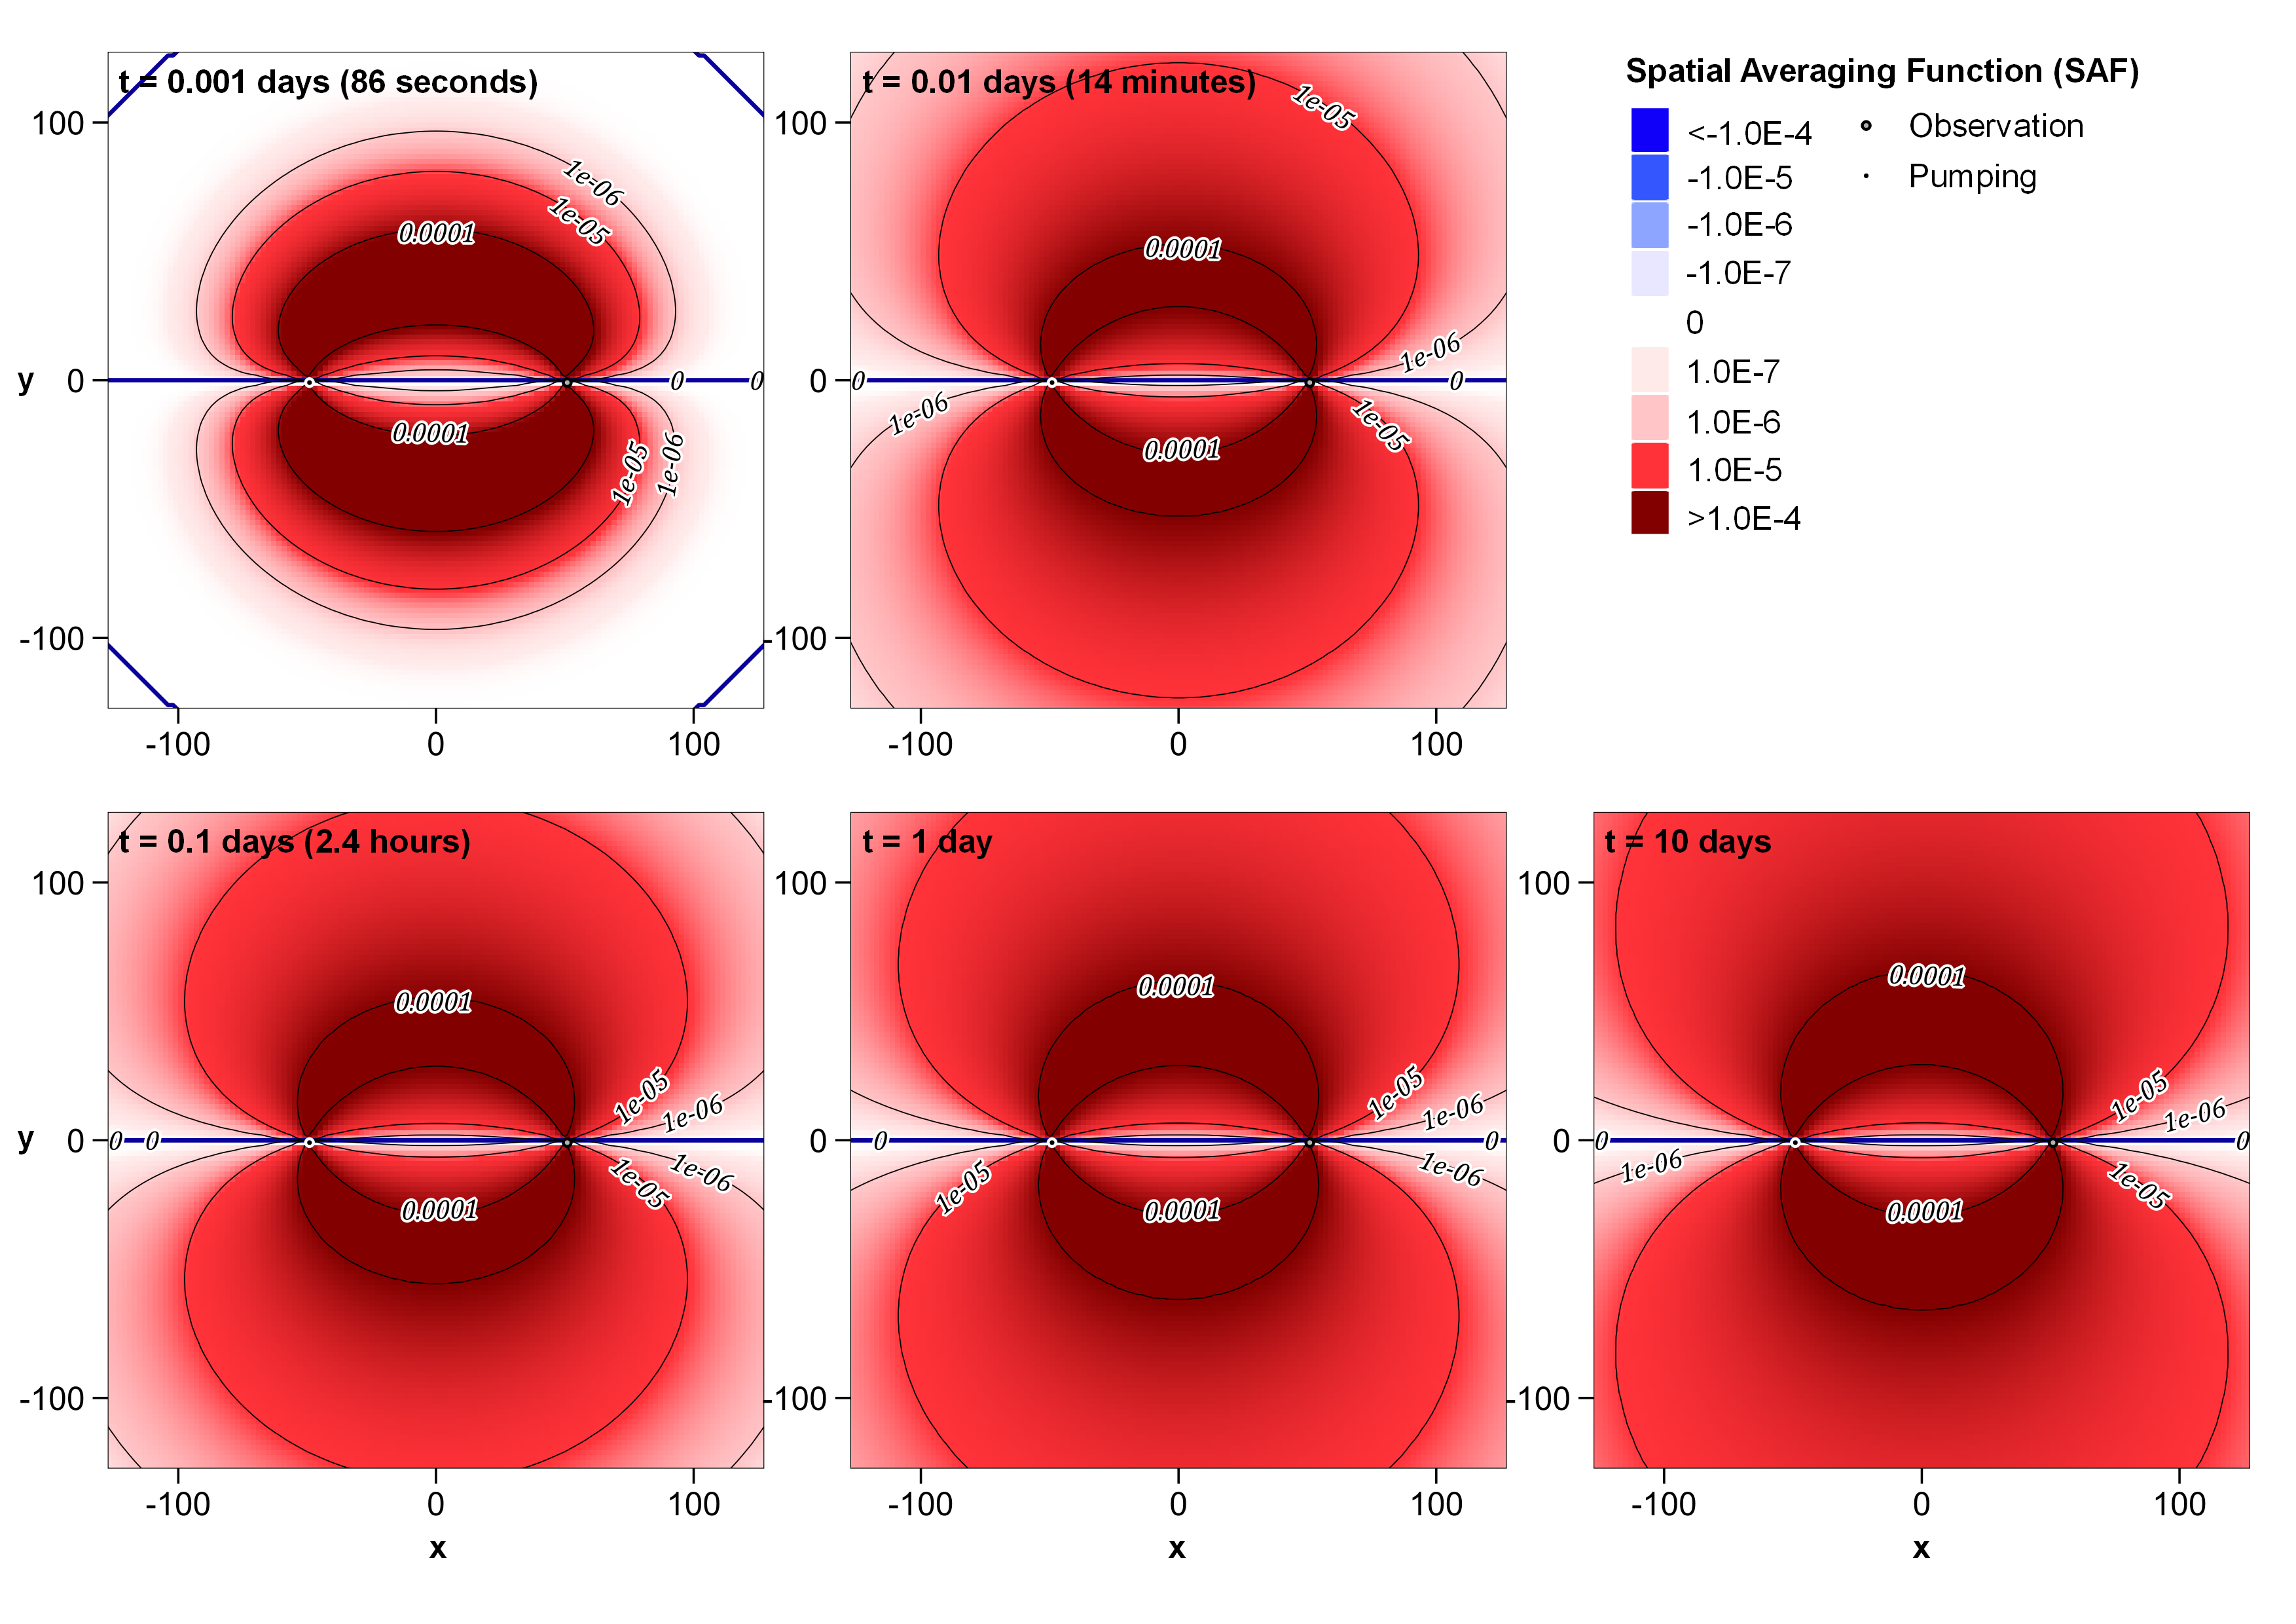


Figure A 8. *R'S*-*Ty* for separated wells at five different times. (log colouring/contour intervals)


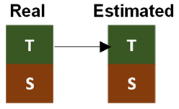

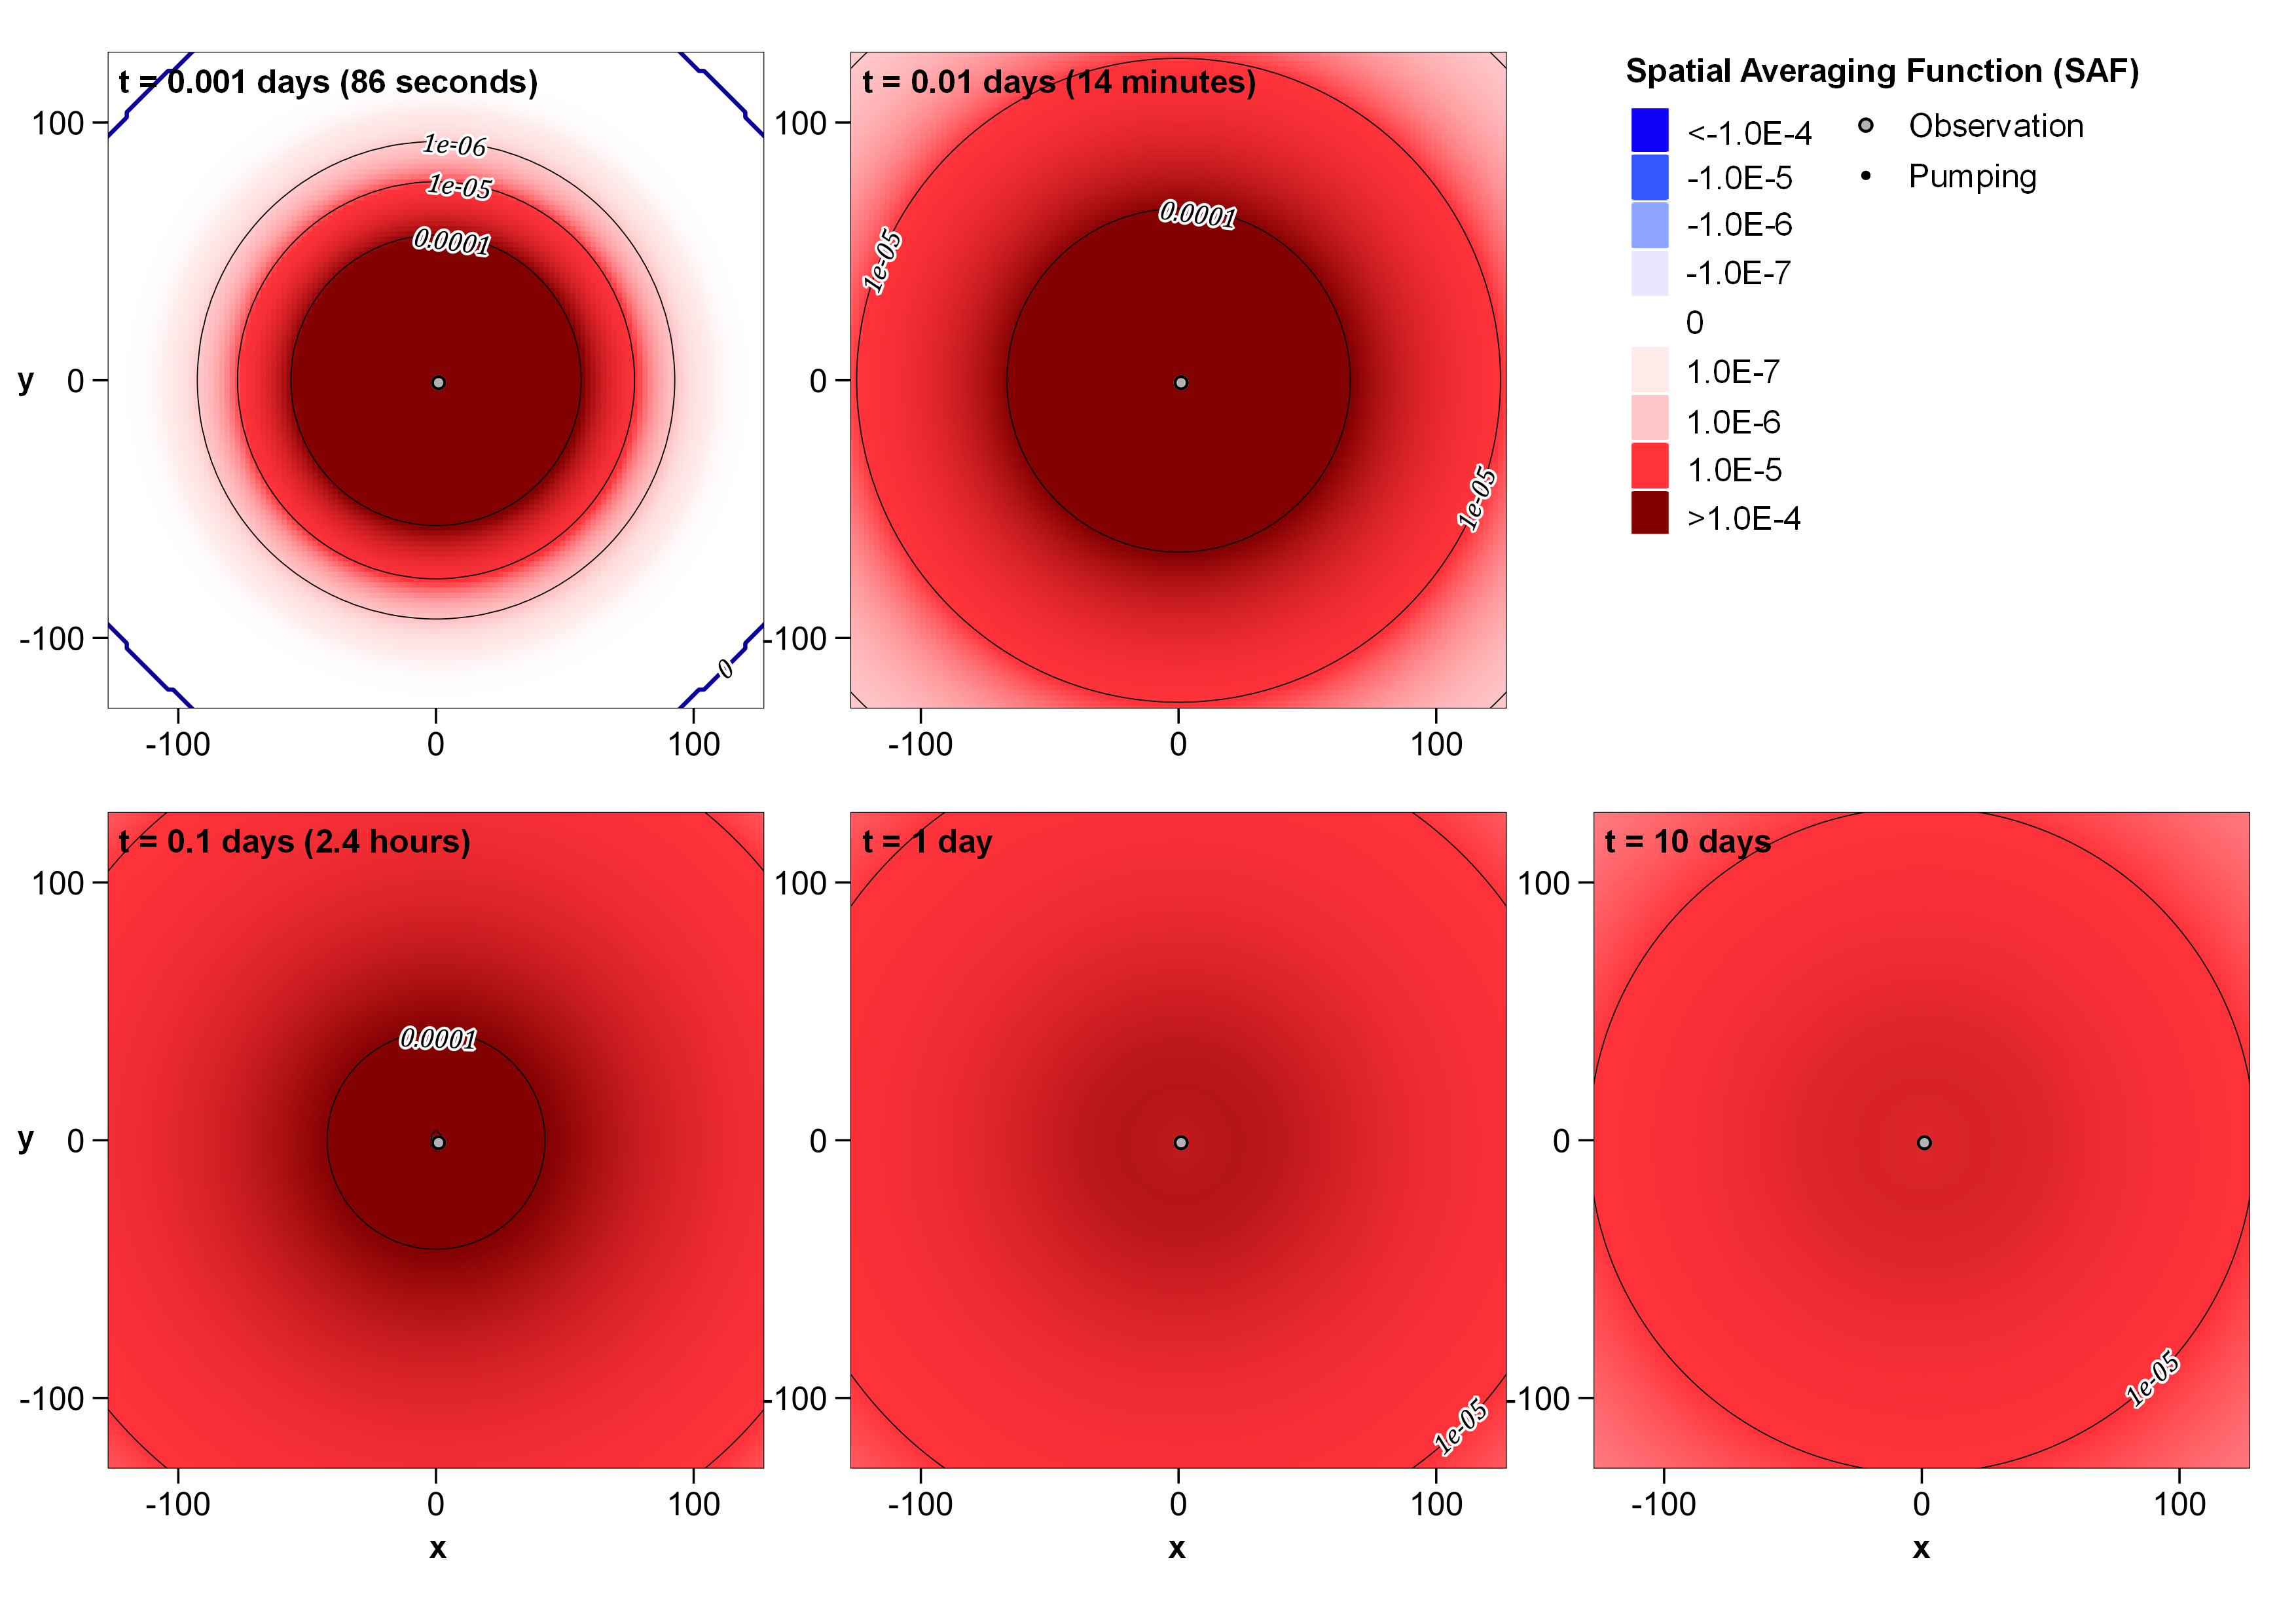


Figure A 9. *R'T*-*T* for near-coincident wells at five different times. (log colouring/contour intervals)


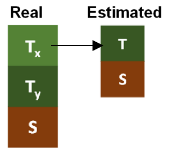

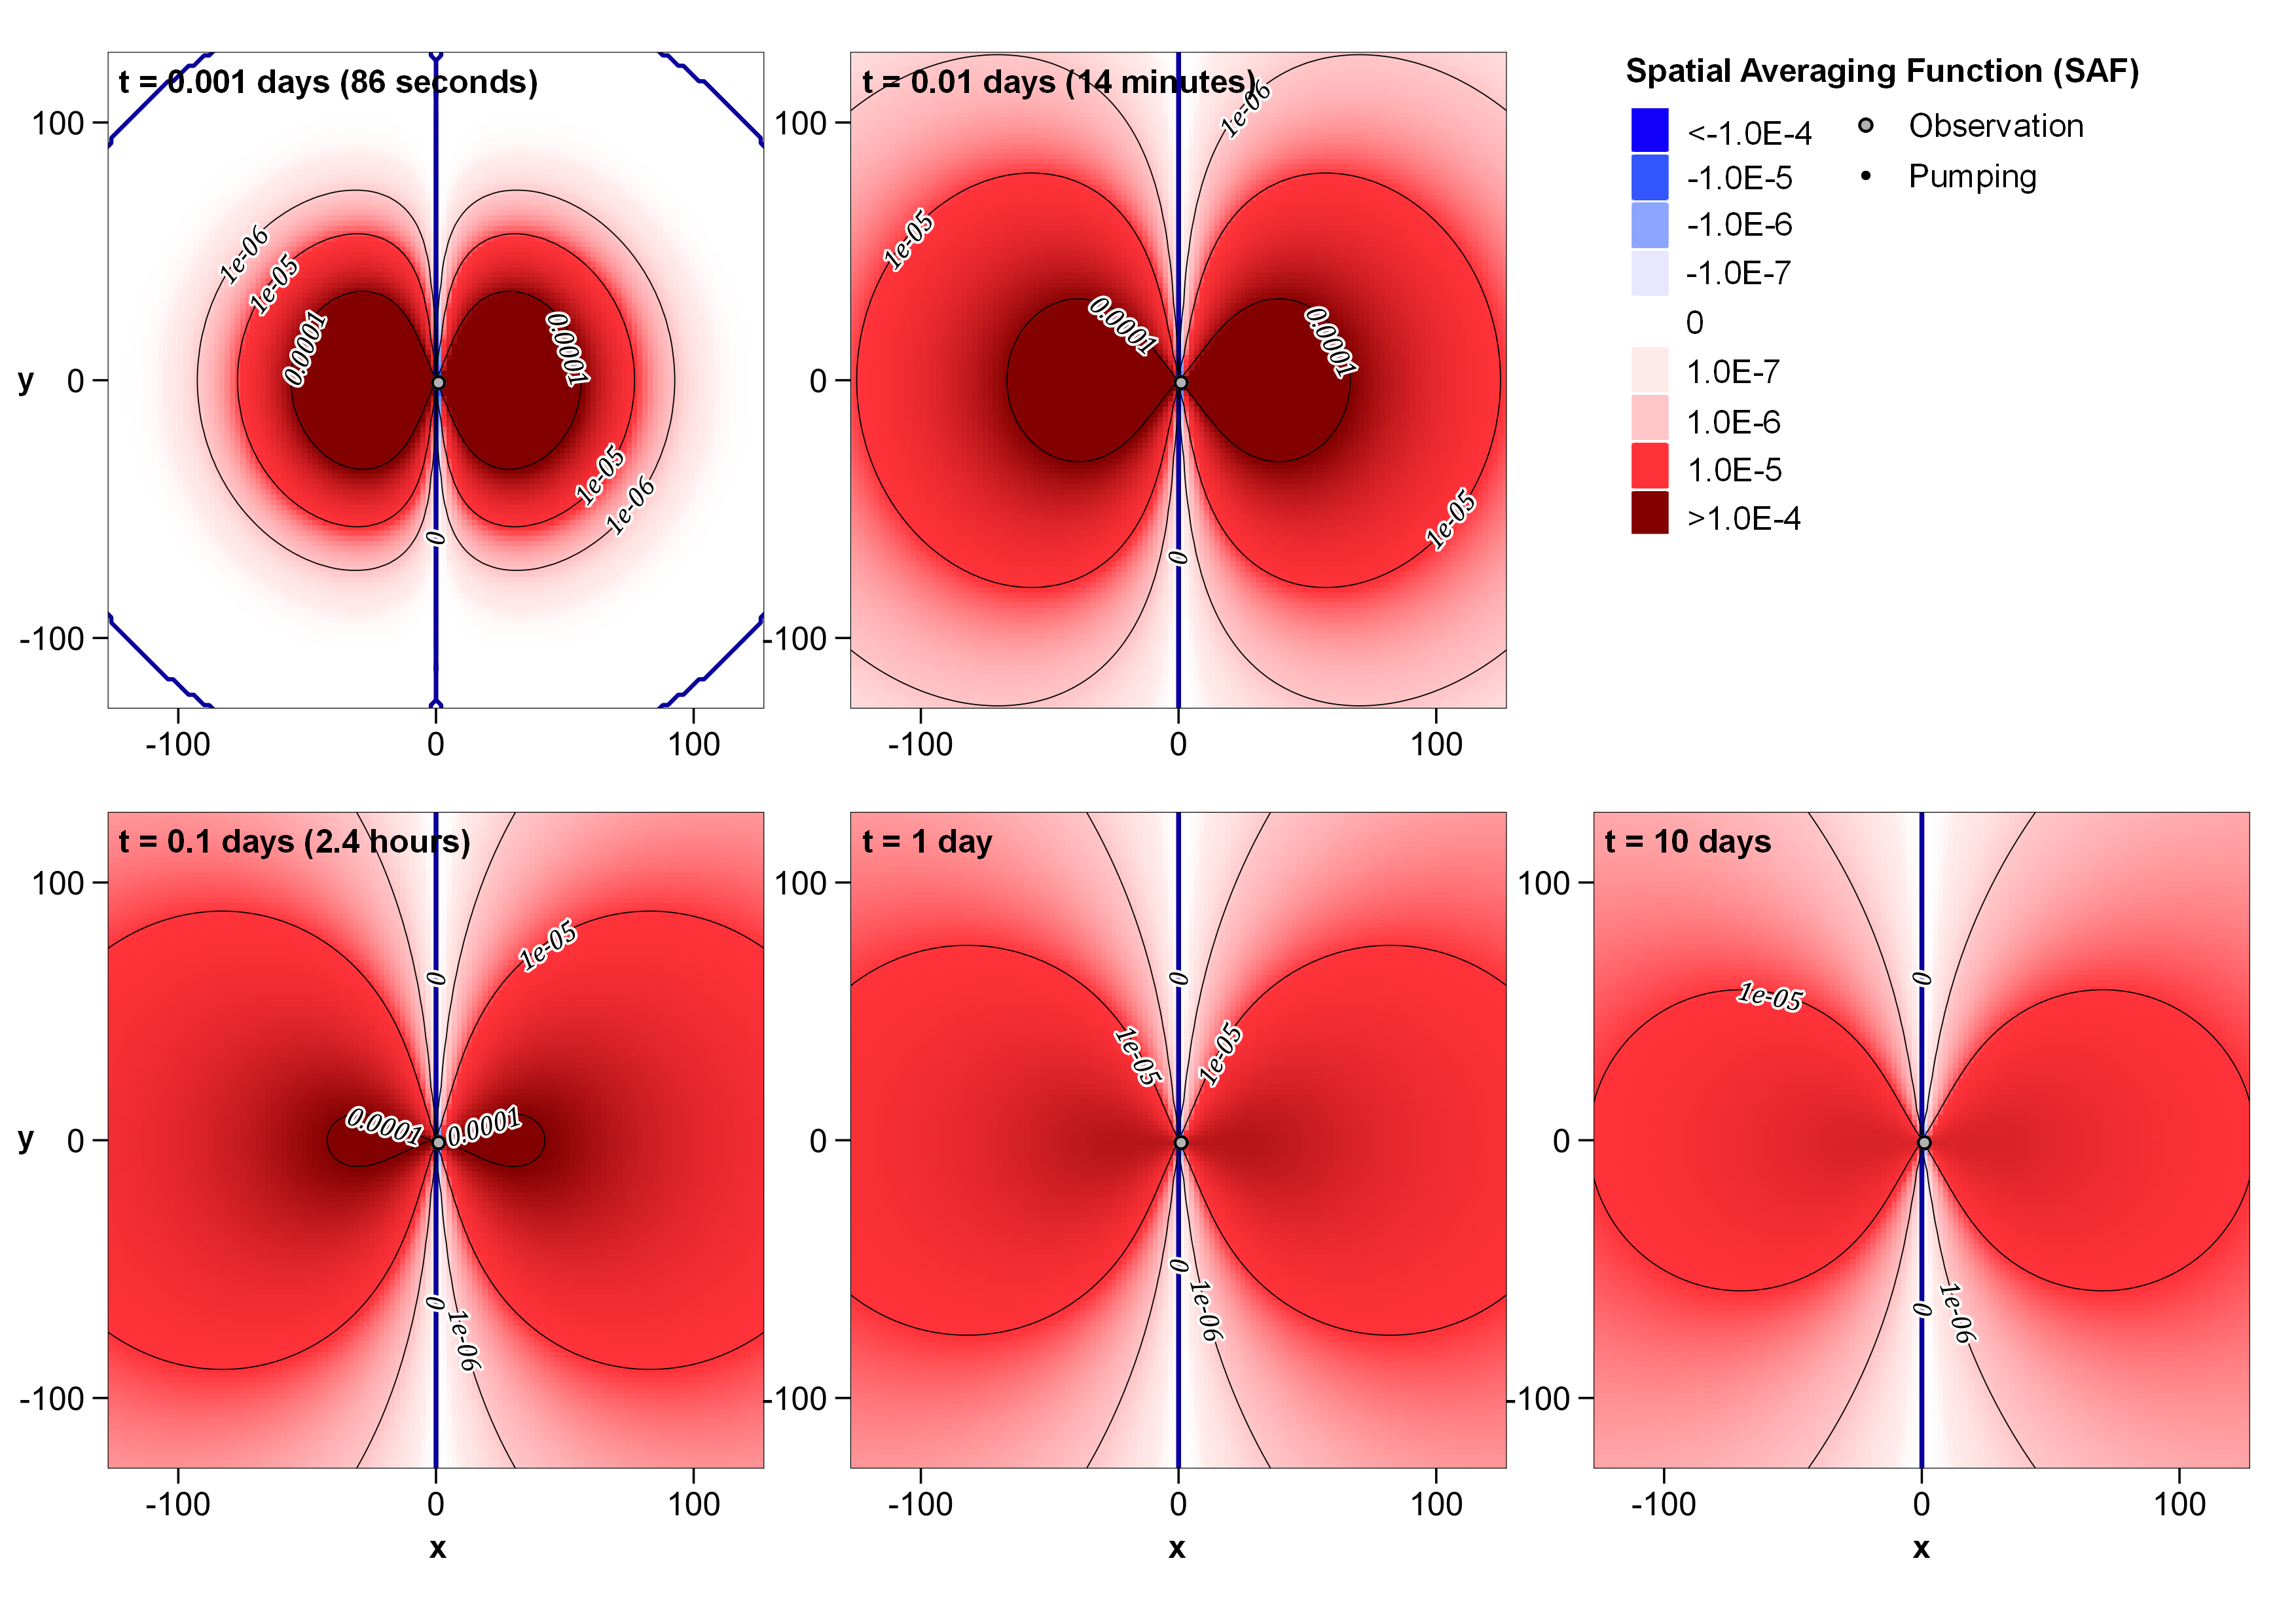


Figure A 10. *R'T*-*Tx* for near-coincident wells at five different times. (log colouring/contour intervals)


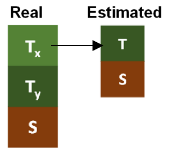

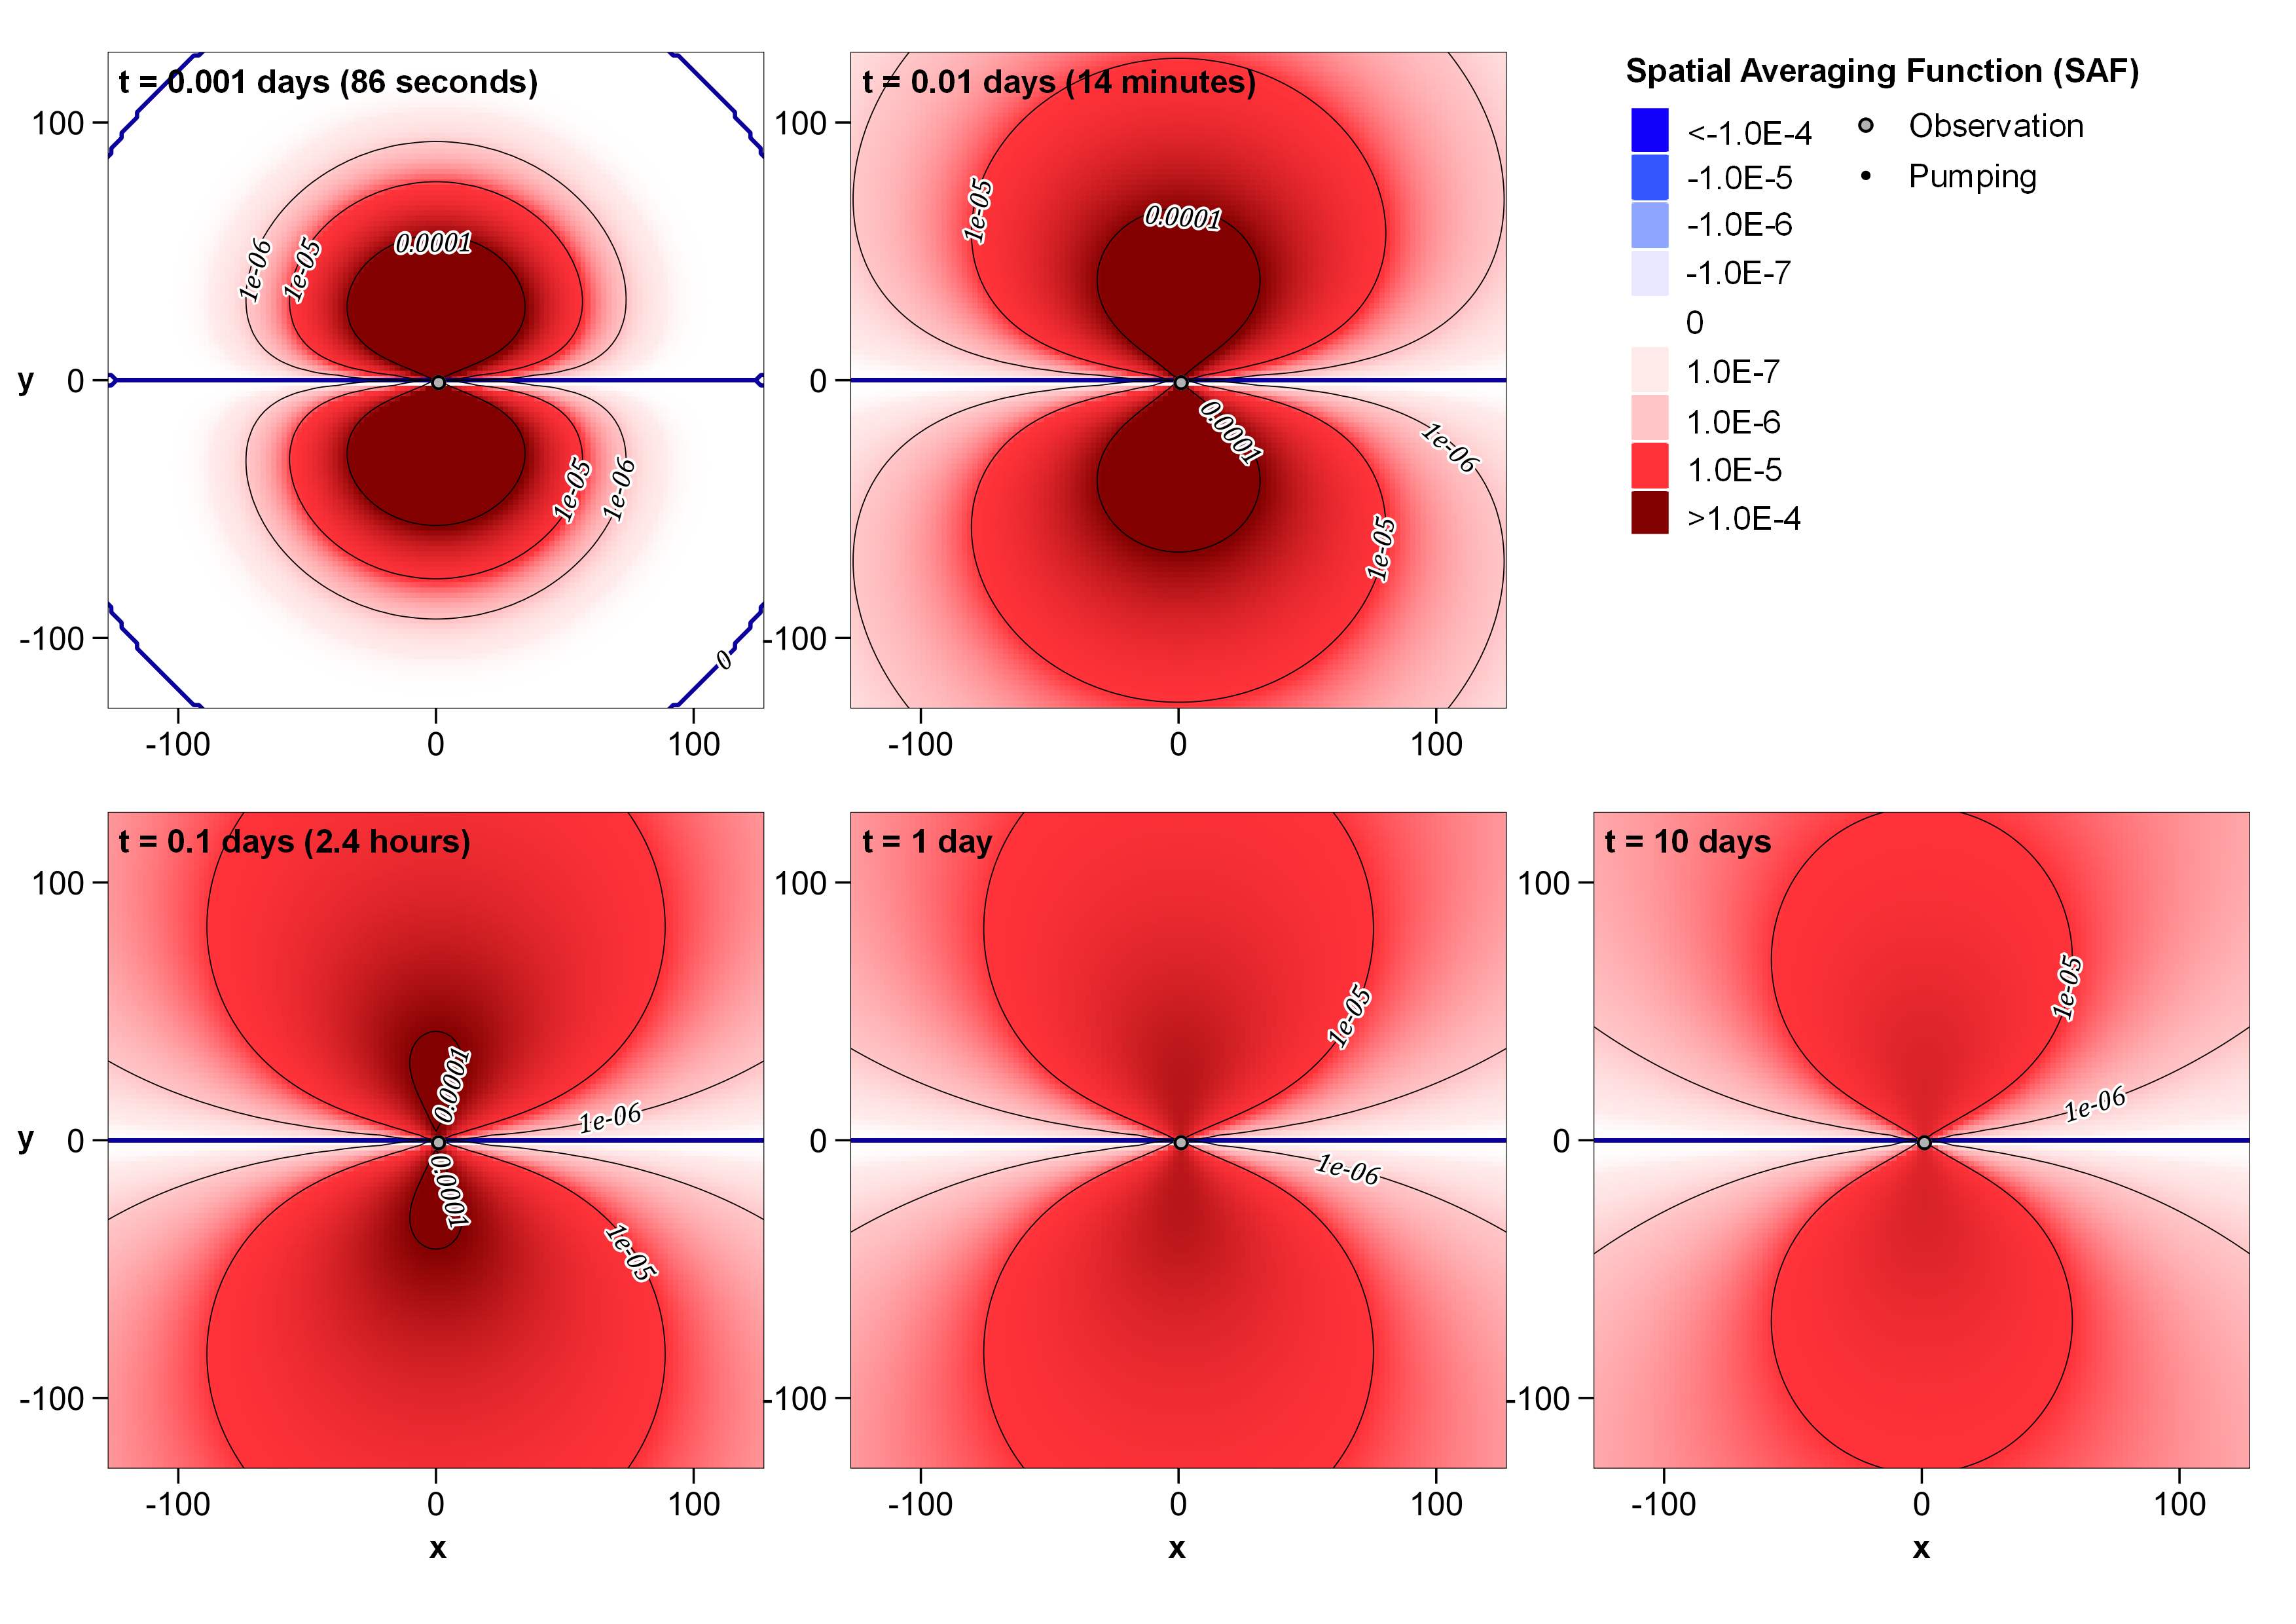


Figure A 11. *R'T*-*Ty* for near-coincident wells at five different times. (log colouring/contour intervals)


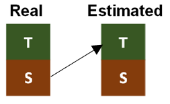

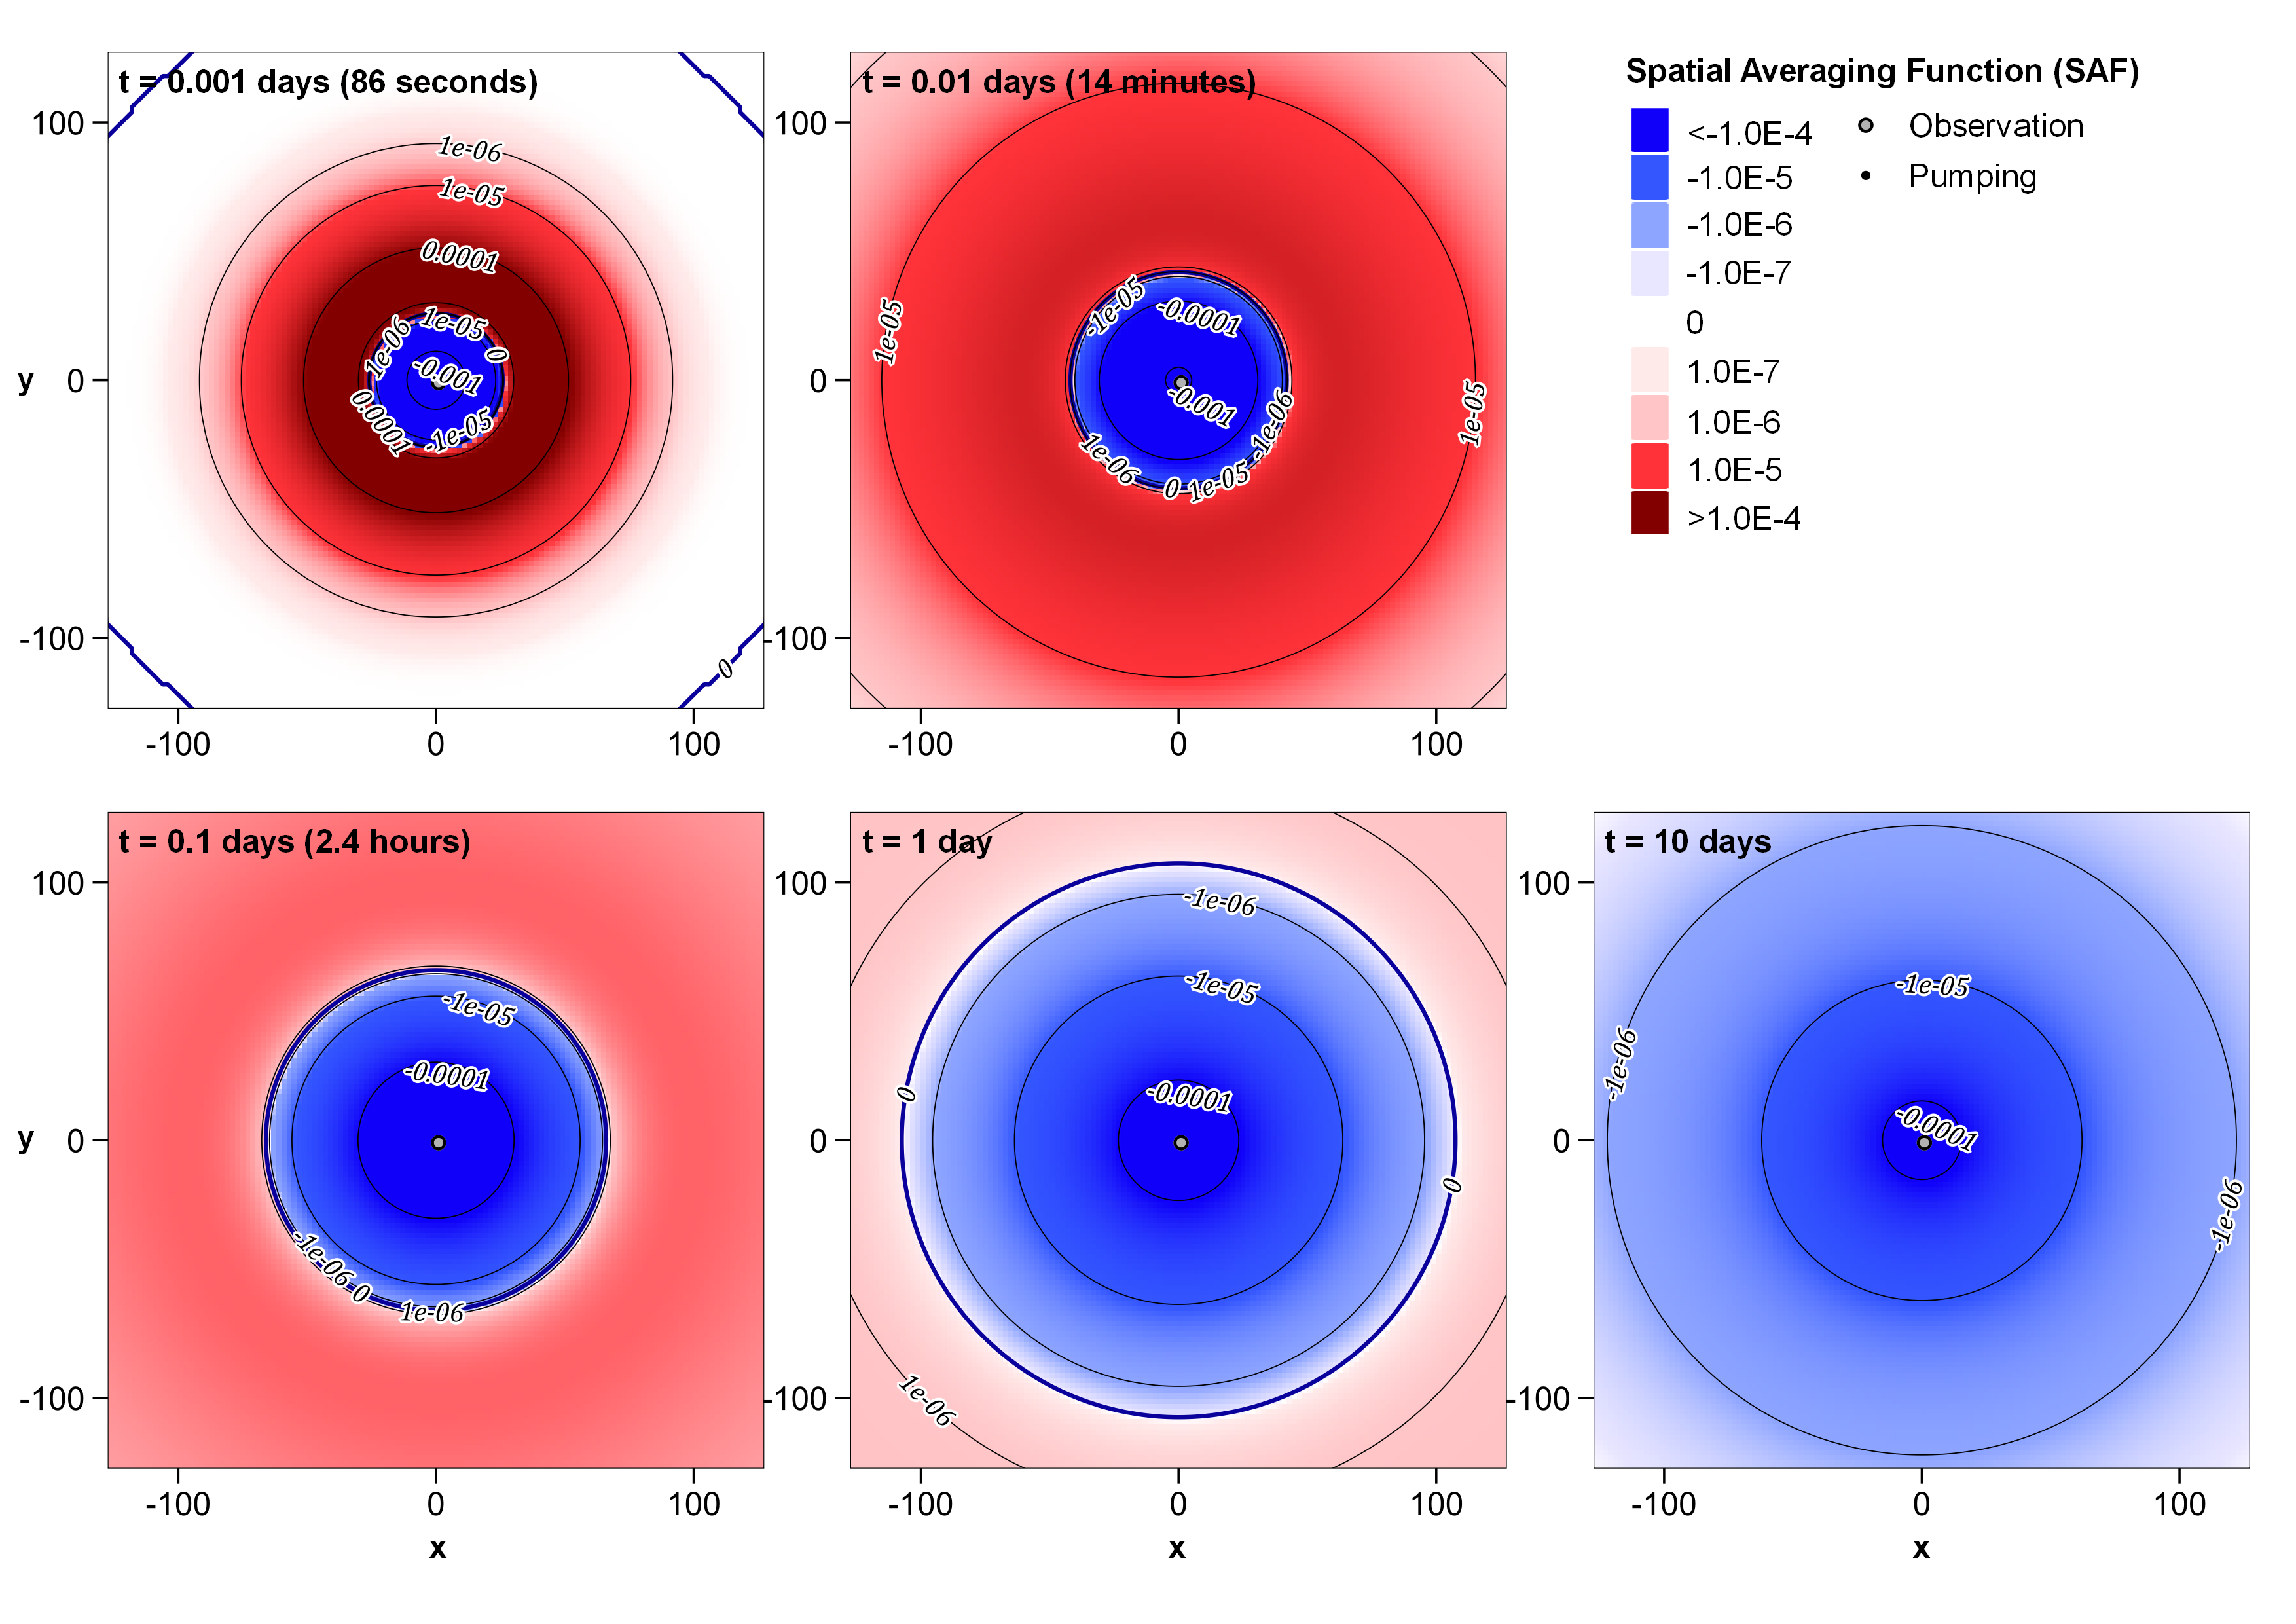


Figure A 12. *R'T*-*S* for separated wells at five different times. (log colouring/contour intervals)
